1 **Transcriptome profiling of tendon fibroblasts at the onset of embryonic muscle**  
2 **contraction reveals novel force-responsive genes**

3

4 Pavan Nayak<sup>1</sup>, Arul Subramanian<sup>2</sup> and Thomas Schilling<sup>2,3</sup>

5 <sup>1</sup>Center for Complex Biological Systems, University of California Irvine, Irvine, CA

6 <sup>2</sup>Department of Developmental and Cell Biology, University of California Irvine, Irvine, CA

7 <sup>3</sup>Lead Contact

8

9 Author for Correspondence: Thomas F. Schilling, 4109 Natural Sciences II, Department of  
10 Developmental and Cell Biology, University of California Irvine, Irvine, CA 92617. Email:  
11 [tschilli@uci.edu](mailto:tschilli@uci.edu).

## 12 **Abstract**

13 All cells are exposed to mechanical forces and must adapt to their physical environments but the  
14 underlying adaptive mechanisms remain unclear. To address this in developing tendons exposed to the  
15 extreme forces of muscle contraction, we have performed transcriptomics with tendon fibroblasts  
16 (tenocytes) isolated from zebrafish embryos before and after they start to swim. We find upregulation  
17 of known tenocyte markers as well as dramatic changes in expression of many novel tendon-associated  
18 genes. By paralyzing and restoring muscle contractions in embryos in vivo, we show that three of these  
19 novel genes, ECM proteins Matrix Remodeling Associated 5b (*mxra5b*) and Matrilin 1 (*matn1*), as well as  
20 the transcription factor Kruppel-like factor 2a (*klf2a*), are force-responsive. In situ hybridization validates  
21 tendon-specific expression of all three genes. Quantitation using in situ hybridization chain reaction  
22 reveals that their transcript levels change specifically in subsets of tenocytes in response to force. These  
23 findings provide insights into force-dependent feedback mechanisms in tendons, which have important  
24 implications for improved treatments for tendon disease, injury and atrophy.

## 25 Introduction

26 Cells experience mechanical forces from their environments such as adhesive interactions between  
27 adjacent epithelial cells or with the surrounding extracellular matrix (ECM). A key question is how cells  
28 adapt and respond to force through mechano-sensitive biochemical cell-signaling pathways. Force-  
29 responsive cellular mechanisms have been implicated in many aspects of cell differentiation (**D'Angelo,**  
30 **et al. 2011**), morphogenesis (**Keller et al. 2008; Hamada 2015**), maintenance and repair (**Riley et al.**  
31 **2022; Zhang et al., 2022**). Despite their importance, these mechanisms remain understudied in vivo,  
32 particularly those that involve cell-ECM interactions. Dramatic examples of such interactions occur in  
33 tendons and ligaments of the vertebrate musculoskeletal system. Tendons experience a broad range of  
34 contractile forces from muscles, such as the extreme compressive forces on the human Achilles tendon  
35 during exercise, and constantly remodel themselves and their surrounding ECM to adapt (**Wang, 2005;**  
36 **Subramanian and Schilling, 2015**). Tendon injuries and atrophy with aging are very common and a  
37 better understanding of the roles played by force in tendon development will aid in developing effective  
38 treatments.

39 Tendons are ECM-rich structures that connect muscles to cartilages and bones. The highly  
40 coordinated events leading to the proper formation of these connections in vertebrates relies upon cell-  
41 ECM interactions (**Schweitzer et al., 2010; Subramanian and Schilling, 2015**). For example, in the early  
42 embryonic zebrafish trunk, myotendinous junctions (MTJs) develop via distinct tendon-independent and  
43 tendon-dependent stages of attachment. Differentiating myoblasts first secrete ECM proteins such as  
44 the integrin ligands Thrombospondin-4 (Tsp4) and Laminin-2 (Lama2) into the developing “pre-tendon”  
45 ECM, which establishes a rudimentary attachment, after which tenocyte progenitor cells (TPC) migrate  
46 to the site leading to MTJ maturation (**Subramanian et al., 2014**). Tenocytes also extend long  
47 microtubule-rich projections outwards into the surrounding ECM, with which they may respond to  
48 mechanical force to locally regulate ECM composition (**McNeilly et al., 1996; Pingel et al., 2014;**

49 **Subramanian et al., 2018**). The maturation of myoblasts and subsequent contractile forces acting on the  
50 MTJs activate Transforming Growth Factor  $\beta$  (TGF- $\beta$ ) coupled, phospho-SMAD (pSMAD)-dependent  
51 signaling in TPCs (**Pryce et al., 2009; Berthet et al., 2013**). Although TGF- $\beta$  is not necessary for TPC  
52 specification, it induces expression of the transcription factors Scleraxis (Scx) and Mohawk (Mkx), likely  
53 through Smad3 binding, which drive tenocyte fate by directly promoting transcription of tendon-specific  
54 ECM proteins, such as Collagen 1 (Col1a1, Col1a2), Col12a1 and Col14 as well as Matrix  
55 Metalloproteinases (MMPs) involved in ECM remodeling (**Berthet et al., 2013; Maeda et al., 2011;**  
56 **Rullman et al., 2009**). TGF- $\beta$  signaling via Smad3 and/or Mkx also represses genes involved in myogenic  
57 and skeletogenic fates, such as *MyoD* (**Chuang et al., 2014; Liu et al., 2001**), *Sox6* (**Anderson et al., 2012**)  
58 and *Runx2* (**Kang et al., 2005**).

59 Cell type and matrix composition differ along the length of many tendons to aid in load bearing  
60 and force transmission. For example, the enthesis region where a tendon attaches to bone is structurally  
61 composed of a gradient of stiffer fibrocartilage closer to the attachment. This is thought to help transfer  
62 mechanical stress between the elastic tendon tissue and rigid bony matrix (**Lu and Thomopoulos, 2013**).  
63 Attachment cells along this fibrocartilage co-express Scx and Sox9, which likely contributes to the  
64 specialized enthesis ECM structure (**Blitz et al., 2013**) (**Zelzer et al., 2014**). Dysregulation of force in  
65 tendons leads to changes in collagen fibril size and organization (**Pingel et al., 2014**), as well as levels of  
66 *COL1*, *COL3*, and *MMP3* mRNA (**Ireland et al., 2001**). Force-responsive tenocyte mRNA expression  
67 profiles have been examined in vitro and ex vivo following injury and during repair. However, while  
68 many studies have demonstrated effects of force on tenocyte transcription in vitro, there have been no  
69 comprehensive transcriptomic studies of tenocyte responses to force in vivo, especially during  
70 embryonic development and the onset of muscular contraction. We have previously shown that force  
71 resulting from the onset of embryonic muscular contraction is required for proper tendon maturation in  
72 zebrafish embryos, including tenocyte morphogenesis and ECM production (**Subramanian et al., 2018**).

73           Here we perform genome-wide bulk RNA-sequencing (RNA-seq) on FAC-sorted tenocytes of  
74   developing zebrafish embryos during the onset of active swimming and trunk muscle contraction. We  
75   identify several known tenocyte markers, expression of which is upregulated as tendons differentiate, as  
76   well as numerous other up- or downregulated genes about which relatively little is known in the context  
77   of tenocyte development or mechano-transduction. Using genetic and physiological perturbations of  
78   muscular force in vivo, we show force-responsiveness of several of these novel tenocyte-associated  
79   genes. These include genes encoding two ECM proteins, Matrix Remodeling Associated 5b (*mxra5b*) and  
80   Matrilin 1 (*matn1*), as well as the transcription factor Kruppel-like factor 2a (*klf2a*). We further use  
81   quantitative in situ methods to confirm their tenocyte- and enthesis-specific expression as well as their  
82   force-responses. These findings provide insights into force-dependent feedback mechanisms in tendons,  
83   which have important implications for improved treatments for tendon disease, injury and atrophy.

## 84 Results

### 85 Onset of active muscle contraction alters tenocyte gene expression

86 Previously, we showed that tenocytes in trunk muscle attachments undergo distinct morphological  
87 transformations coinciding with the onset of muscle contraction (**Subramanian et al., 2018**). Since these  
88 changes occur during the embryonic transition from twitching (36 hours post-fertilization, hpf) to free-  
89 swimming behavior (48 hpf), we hypothesized that force-induced transcriptional changes in tenocytes  
90 underlie these morphological changes. To test this and identify potential force-responsive factors, we  
91 conducted RNA-seq with FAC-sorted populations of *Tg(scxa:mCherry)*-positive tenocytes isolated from  
92 dissociated 36 or 48 hpf embryos. From 11 total biological replicates (7 replicates for 36 hpf, 4 replicates  
93 for 48 hpf after quality control (**see Methods**), 35 embryos per replicate) we obtained approximately  
94 10,000-15,000 cells per sample replicate. Pair-wise comparisons of over 17,000 genes from bar-coded  
95 cDNA libraries revealed 1,123 differentially expressed genes (DEGs) between 36 and 48 hpf with a False  
96 Discovery Ratio (FDR) adjusted p-value < 0.05 (**Fig. 1A**). These included upregulation of known tenocyte  
97 markers such as *tnmd*, *mkxa*, and *egr1* (**Fig. 1B**), confirming that the sorted mCherry positive cells  
98 included mature tenocytes or progenitors in the process of differentiation. *scxa* expression also  
99 increased, though with a slightly less significant adjusted p-value (0.09) (**Supplementary Data 1**).  
100 Principle Components (PC) associated with biological replicates segregated according to experimental  
101 condition (36 versus 48 hpf), validating the library preparation protocol (**Fig. 1C**). GO analysis for  
102 Biological Process (BP) terms associated with the top DEGs showed significant enrichment for “skeletal  
103 system development” and “ECM organization” (**Fig 1D**), while Molecular Function (MF) and Cellular  
104 Component (CC) GO terms were similarly enriched for ECM-associated features (**Supplementary Figure**  
105 **1**). Surprisingly, among the DEGs were genes typically associated with cartilage development and  
106 morphogenesis, including *matn1*, *col2a1a* and *col9a1a*. This suggests novel roles for these genes in

107 tenocytes, possibly an early subset of *scxa*<sup>+</sup> cells in embryonic tendons that have already adopted a  
108 fibrocartilage fate later associated with developing entheses.

109 To identify cell signaling and cell adhesion pathways implicated in force-responses during  
110 embryonic tendon development, we analyzed our DEG list using two software suites, PANTHER **(Mi and**  
111 **Thomas, 2019) (Supplementary Table 1)** and DAVID **(Supplementary Table 2)**, which utilize KEGG  
112 pathway annotations, for pathway analysis **(Huang et al., 2009)**. PANTHER identified DEGs associated  
113 with 96 different pathways, including many genes implicated in Wnt, TGF- $\beta$ , Platelet Derived Growth  
114 Factor (PDGF), and Retinoic Acid (RA) signaling as well as Integrin (Itg) and Cadherin (Cdh) mediated  
115 adhesion **(Supplementary Table 1)**. In contrast, DAVID identified DEGs involved in RA metabolism, an  
116 emerging pathway of interest in tendon development, and also highlighted differential expression of  
117 genes encoding many ribosomal proteins. **(Supplementary Table 2)**.

118 Our RNA-seq DEG datasets were obtained from TPCs and tenocytes during the onset of  
119 swimming, so we performed a targeted search for DEGs associated with mechanosensitive pathways,  
120 which might have been missed by pathway analysis software due to limitations in annotation databases.  
121 Using a custom automated literature screening tool, LitScreen **(see Methods)**, three genes of particular  
122 interest, *matn1*, *klf2a* and *mxra5b*, emerged based either on their force-dependent regulation in other  
123 biological contexts, and/or regulation by TGF- $\beta$ , a well-known force-responsive signal. *matn1*, which  
124 encodes an ECM protein highly enriched in cartilage, was the top-most upregulated gene by FDR  
125 adjusted p-value **(Supplementary Data 1)**. *Matn1* has been implicated in enhancement of  
126 chondrogenesis of synovial fibroblasts treated with TGF- $\beta$  **(Pei et al. 2008)**. The transcription factor *klf2a*  
127 was also strongly upregulated and Klf proteins such as Klf2 and Klf4 have been implicated in enthesis  
128 development in mammalian tendons **(Kult et al., 2021)**. Klf proteins repress TGF- $\beta$  signaling in  
129 endothelial cells **(Boon et al., 2007; Li et al., 2021)** and *klf2a* expression is mechanosensitive during  
130 heart valve development **(Steed et al., 2016)**. *mxra5b* encodes an ECM protein expressed in both

131 tendons and ligaments during chick development (**Robins and Capehart, 2018**) and is regulated by TGF-  
132  $\beta$  signaling in cultured human kidney epithelial cells (**Poveda et al., 2017**). Other potential  
133 mechanosensitive genes in our RNA-seq dataset based on literature screening for pathways “Piezo” and  
134 “YAP/TAZ”, included *her2* and *ccn1*, respectively. Interestingly, *her2* expression increases in response to  
135 force in gastric cancer cells (**Akutagawa et al., 2018**), and *ccn1* (also known as *cyr61*) is expressed in limb  
136 tendons in mice (**Lorda-Diez et al., 2011**). For these reasons, we focused on *matn1*, *klf2a* and *mxra5b* for  
137 further analysis.

138

139 ***matn1*, *klf2a* and *mxra5b* are expressed in tenocytes and respond to perturbations of muscular**  
140 **contraction in vivo**

141 To verify specific expression of *matn1*, *klf2a* and *mxra5b* in tenocytes, we performed in situ  
142 hybridization (ISH). Conventional chromogenic ISH for *matn1* failed to detect expression at 36 hpf,  
143 whereas strong expression was observed at 48 and 60 hpf in developing craniofacial and pectoral fin  
144 cartilages (**Fig. 2A-C**). Because of its strong expression in chondrocytes, we hypothesized that differential  
145 expression of *matn1* in our dataset could be a result of tenocyte-specific expression in developing  
146 enthesis progenitors closely associated with embryonic cartilages. To this end, we conducted double  
147 fluorescent in situ Hybridization Chain Reaction (*isHCR*) for *scxa* and *matn1* at 51 hpf, 3 hours older than  
148 our RNA-seq samples to allow better visualization of differentiated chondrocytes, and 72 hpf. We found  
149 co-expressing cells at the ceratohyal-interhyal (ch-ih) and ceratohyal-hyohyal (ch-hh) cartilage-muscle  
150 attachment sites at 72 hpf (**Fig. 3A-E Supplementary Figure 2A-G**). For *klf2a*, chromogenic ISH revealed  
151 expression at somite boundaries in the trunk at 48 hpf as well as developing pharyngeal arches and  
152 pectoral fins at 48 and 60 hpf (**Fig. 2D-F**). This was confirmed by double *isHCR* of *klf2a* and *scxa* showing  
153 overlapping expression in tenocytes at somite boundaries at 48 hpf (**Figure 3F-J**). *mxra5b* expression was



154 first detected at somite boundaries near the horizontal myoseptum (HMS), which separates dorsal and  
155 ventral somites at 36 hpf, as well as in the notochord at 48 hpf. Expression increased and extended  
156 along the somite boundaries by 60 hpf at trunk muscle-tendon attachment sites (**Fig. 2G-I**). Using double  
157 isHCR of *scxa* and *mxra5b*, we found co-expressing tenocytes at somite-boundaries in embryos at 48 hpf  
158 and 72 hpf (**Fig. 3K-O**).

159 Because *matn1*, *klf2a* and *mxra5b* were identified among the top DEGs at the onset of  
160 swimming behavior (**Supplementary Data 1; Fig 4A-C**), we hypothesized that mechanical force may  
161 regulate their expression. To test this, we performed Real Time Quantitative-PCR (RT-qPCR) in  
162 genetically paralyzed embryos. Relative expression of each gene was compared between wild-type (WT)  
163 embryos and homozygous mutants for voltage dependent L-type calcium channel subtype beta-1  
164 (*cacnb1*<sup>-/-</sup>), which are paralyzed due to lack of muscle contraction (**Subramanian et al., 2018; Zhou et al.,**  
165 **2006**). At 48 hpf, we observed significant downregulation of all 3 genes in *cacnb1*<sup>-/-</sup> mutants as  
166 compared to WT (**Fig. 4D**). In contrast, at 72 hpf, only *matn1* and *mxra5b* remained downregulated,  
167 while *klf2a* expression increased in paralyzed embryos (**Fig. 4E**). To confirm that these expression  
168 changes are due to loss of mechanical force, we injected embryos at the 1-cell stage with mRNA  
169 encoding full-length alpha-bungarotoxin mRNA ( $\alpha$ BTX), which irreversibly binds to acetyl choline  
170 receptors at the neuromuscular synapse leading to paralysis. We used 90ng/ul of full-length  $\alpha$ BTX  
171 mRNA which was optimized to paralyze embryos for the first two days of embryogenesis after which  
172 they gradually recover movement. A proportion of  $\alpha$ BTX-injected ( $\alpha$ BTX-inj) embryos regained muscle  
173 contractions at 48 hpf and we performed RT-qPCR on cDNA derived from control,  $\alpha$ BTX-inj paralyzed,  
174 and  $\alpha$ BTX-inj recovered embryos. We separated 48 hpf recovered embryos into two subgroups based on  
175 the extent of muscle contraction: 1) partially recovered (Twitching), in which embryos showed sporadic  
176 contractions of the trunk and pectoral fin muscles, but did not swim freely, similar to embryos at 36 hpf  
177 and 2) fully recovered (Recovered), in which embryos swam freely. At 48 hpf, RT-qPCR revealed

178 significant downregulation of *matn1* and *mxra5b* in  $\alpha$ BTX paralyzed embryos compared to WT  
179 uninjected siblings, similar to the relative expression we observed in *cacnb1*<sup>-/-</sup> mutant embryos (**Fig. 4F**).  
180 *matn1* and *mxra5b* were upregulated in twitching and recovered embryos, though these results were  
181 not statistically significant for *mxra5b* (**Fig. 4G, H**). In contrast, *klf2a* was upregulated, though not  
182 statistically significantly, in paralyzed embryos versus WT embryos (**Fig. 4F**). These results, combined  
183 with our RNA-seq findings, suggest that *matn1*, *klf2a*, and *mxra5b* transcription are regulated by the  
184 mechanical forces of muscle contraction.

185

#### 186 **Tenocyte-specific gene expression of *klf2a*, *mxra5b* and *matn1* is regulated by muscle contraction**

187 Because RT-qPCR was performed on cDNA isolated from whole embryos rather than on tenocytes alone,  
188 the expression differences we observed for *matn1*, *klf2a*, and *mxra5b* may have reflected changes in  
189 expression in cell types other than tenocytes (e.g. *matn1* in cartilage). Therefore, to confirm force-  
190 responsiveness in tenocytes, we examined expression of *matn1*, *klf2a*, and *mxra5b* in *scxa*-positive cells  
191 at 48 or 72 hpf by *isHCR*, using our  $\alpha$ BTX paralysis-recovery experimental protocol (**Fig. 4I-K**). For *matn1*,  
192 we quantified expression by measuring its fluorescence intensity in individual attachment cells at the ch-  
193 ih and ch-hh attachment sites of the distal end of the ch cartilage. Individual attachment cells were  
194 carefully selected for quantification only if they satisfied the following criteria: 1) they were located at  
195 these muscle attachment sites, 2) they co-expressed both *matn1* and *scxa* and 3) they were spatially  
196 adjacent to both chondrocytes expressing high levels of *matn1* alone and tenocytes expressing high  
197 levels of *scxa* alone. Individual cell quantification revealed no significant difference in *matn1* expression  
198 between WT and paralyzed embryos, but a drastic increase in expression in partially recovered,  
199 twitching embryos, followed by a return to WT levels in fully recovered embryos (**Fig. 4I**). For *mxra5b*  
200 quantification, we examined its fluorescence intensity in *scxa/mxra5b* double positive tenocytes located

201 at somite boundaries at 48 hpf. Individual cells were selected for analysis only if they were located along  
202 ventral somite boundaries or HMS regions and co-expressed *scxa* and *mxra5b*. Similarly, for *klf2a*, we  
203 quantified expression by measuring its fluorescence intensity in *scxa/klf2a* double positive tenocytes at  
204 the somite boundaries, primarily at the HMS. We observed increased expression of *klf2a* in paralyzed  
205 embryos compared to WT, then a return to WT levels upon full recovery (**Fig. 4J**). Conversely, we  
206 observed decreased expression of *mxra5b* in paralyzed embryos compared to WT, followed by a return  
207 to WT levels in twitching and recovered groups (**Fig. 4K**). Together, these results suggest that  
208 mechanical force initiated by the onset of muscle contraction regulates the transcriptional dynamics of  
209 *matn1* in cartilage attachment cells of craniofacial tendons, which are putative enthesis progenitors, as  
210 well as *klf2a* and *mxra5b* in tenocytes associated with axial and trunk muscle attachments.

## 211 Discussion

212 Whereas mechanotransduction has been implicated in tenocyte development and tendon maintenance,  
213 few studies have examined transcriptional changes within these fibroblasts in response to force,  
214 particularly in vivo. Here, we provide a genome-wide profile of differential tenocyte gene expression  
215 during critical stages of muscle contraction onset and differentiation of TPCs in zebrafish embryos. We  
216 identify three force-responsive genes, two encoding ECM proteins, *matn1* and *mxra5b*, and one  
217 transcription factor, *klf2a*, and show that perturbing muscle contraction alters their mRNA levels  
218 specifically in tenocytes. While *matn1* expression appears specific to enthesal tenocytes at cranial  
219 muscle attachments to cartilage involved in jaw movements, *mxra5b* and *klf2a* expression localizes to  
220 tenocytes associated with MTJs of the axial musculature involved in swimming (**Figure 5**). These results  
221 are consistent with a model in which tenocytes continuously sense force and respond by altering  
222 transcription of genes involved in fine tuning the surrounding ECM (**Subramanian and Schilling, 2015;**  
223 **Subramanian et al., 2018**). Many tendon mechanotransduction studies have been performed with  
224 mature tendons in in vitro/ex vivo conditions e.g. explanted into collagen matrices and exposed to  
225 cyclical strain or other forces. Our results demonstrate transcriptional changes in developing tenocytes  
226 in response to force in vivo in intact embryos when tendons first form and identify novel components of  
227 tenogenesis. They also highlight the close relationship between genes implicated in cartilage (i.e. *matn1*)  
228 and fibrocartilage (i.e. *KLF* transcription factors) associated with tendon entheses with tenocytes and  
229 their coordinated responses to mechanical force.

230         Though typically thought of as cartilage-specific ECM proteins, expression of matrilin genes,  
231 including *Matn1*, has been reported in single-cell RNA-seq (scRNA-seq) analyses of newly differentiating  
232 tendon and fibrocartilage fibroblasts (**Kaji et al., 2021**). Our results confirm *matn1* expression in  
233 zebrafish tenocytes at muscle attachments immediately adjacent to cartilage in situ, consistent with  
234 developing entheses, and demonstrate an acute response to mechanotransduction. Our RT-qPCR data

235 show decreased *matn1* expression in whole embryos in the absence of muscle contraction. However,  
236 expression in cranial tenocytes as detected by isHCR remains unchanged under the same conditions and  
237 then rapidly increases as the embryo recovers from paralysis. This may be due to differential responses  
238 in cartilage-specific versus tendo-chondral expression to muscle contraction force. In mammals, *Matn1*  
239 is essential for ECM organization in cartilage, as chondrocytes and their surrounding ECM are  
240 disorganized in *Matn1*<sup>-/-</sup> mutant mice and expression returns when mechanical load is restored during  
241 recovery from medial meniscus destabilization surgery (**Chen et al., 2016**). Ours are the first studies  
242 implicating *Matn1* in tendon/fibrocartilage development or mechanotransduction. Similarities in  
243 mechanosensitive expression in chondrocytes and tenocytes associated with muscle attachments  
244 suggest that *Matn1* may function in establishment/organization of the ECM stiffness gradient between  
245 stiffer cartilage and more flexible tendon at the enthesis.

246 *Mxra5* (also known as *adlican*) encodes a secreted proteoglycan implicated in cell-cell adhesion  
247 and/or ECM remodeling as shown in the pathological context of cancer (**He et al., 2015**) (**Wang et al.,**  
248 **2013**). We provide evidence that *mxra5* expression in axial tenocytes involved in swimming requires the  
249 force of muscle contraction and is rapidly upregulated in response to the recovery of force following  
250 paralysis. *MXRA5* expression has been reported in tendons and connective tissues of developing chick  
251 embryos (**Robins and Capehart, 2018**), but its functions remain unclear. Human *MXRA5* is also  
252 expressed in fibroblasts (**Chondrogianni et al., 2004**), upregulated along with other ECM-associated  
253 genes in response to injury (**Gabrielsen et al., 2007**), and downregulated in response to TGF- $\beta$ 1 (**Poveda**  
254 **et al., 2017**) in various tissue contexts. Our results provide some of the first evidence that *mxra5* is a  
255 mechanosensitive gene, possibly regulated by TGF- $\beta$ . However, while our RT-qPCR results suggest that  
256 *mxra5* is downregulated upon muscle contraction, both RT-qPCR and *isHCR* results show *mxra5*  
257 upregulation upon recovery from paralysis. This apparent discrepancy may reflect differences in the cell  
258 populations sampled (e.g. whole embryos versus tenocytes), or more interestingly may reflect other

259 developmental regulators of *mxra5b* acting in parallel to mechanotransduction in tenocytes. For  
260 example, tenocytes may acquire a temporary ECM remodeling state in *cacnb1*<sup>-/-</sup> mutant and  $\alpha$ Btx-  
261 injected embryos associated with increased expression of *Mxra5* as suggested for pathologies such as  
262 myocardial ischemia (**Gabrielsen et al., 2007**) or osteoarthritis (**Balakrishnan et al., 2014**). Further  
263 studies will be required to delineate functional roles for *Mxra5* in vertebrate tenocytes.

264         Recent research in mice showed roles for KLF2, as well as KLF4, in cell differentiation at tendon-  
265 bone entheses (**Kult et al., 2021**), but did not explore their responses to force. We show that *klf2a* in  
266 zebrafish axial tenocytes is mechanoresponsive. While  $\alpha$ BTX-injected embryos showed no significant  
267 changes in *klf2a* expression with paralysis, it was significantly downregulated in tenocytes upon recovery  
268 (**Fig. 4F, 4J**). In contrast our RNA-seq data showed *klf2a* upregulation with onset of muscle contraction  
269 (**Fig. 4B**). Like *mxra5*, these apparent discrepancies may reflect distinct cell populations sampled or  
270 separate parallel pathways that regulate *klf2a*. Although *Klf2* is regulated by force in other contexts,  
271 such as endocardial and vascular endothelial cells (**Lee et al., 2006; Boselli et al., 2015; Steed et al.,**  
272 **2016**), the molecular pathways that control *Klf2* expression are not well characterized.

273         We found dramatic changes in expression of many other genes implicated in crucial  
274 developmental and mechanotransduction signaling pathways that appear differentially expressed in  
275 response to muscle contraction in zebrafish tenocytes. These include well studied pathways such as TGF-  
276  $\beta$ , as well as others such as and RA, Piezo and YAP/TAZ signaling, about which roles in tenocytes remain  
277 largely unexplored. Recent research in mammals has implicated RA-signaling in tendon development  
278 (**Mcgurk et al., 2017**), including tenocyte fate determination and TGF- $\beta$  signaling (**Kaji et al., 2021**). The  
279 RA degradation enzyme *cyp26b1* has also been implicated in cranial tendon development in zebrafish  
280 (**Supplementary Data 1**) (**Laue et al., 2008**). Two genes implicated in the Piezo mechanotransduction  
281 pathway, *her2* and *atf2*, were both downregulated upon onset of muscle contraction in our DEG dataset

282 **(Supplementary Data 1)**. Piezo 2 regulates *her2* expression in breast cancer cells **(Lou et al., 2018)**, while  
283 PIEZO1 regulates *atf2* in chondrocytes **(Lee et al., 2021)**. Finally, a gene shown to be regulated by the  
284 YAP-TAZ mechanotransduction pathway, *CCN1*, was upregulated upon onset of muscle contraction in  
285 our RNA-seq data **(Supplementary Data 1) (Ho et al., 2018)**. Recent studies suggest that tenocytes  
286 cultured in a 3D collagen matrix and subjected to mechanical uniaxial stretching upregulate *Yap1* **(Kaji et**  
287 **al. 2021)**. Our data provide further support for roles for RA signaling as well as Piezo and Yap/Taz  
288 mediated mechanotransduction in tenocytes and suggest that their functions are conserved in zebrafish.

289 TGF- $\beta$  signaling is a well-established regulator of tenocyte cell fate **(Subramanian and Schilling,**  
290 **2015; Bobzin et al., 2021)**, but the gene regulatory networks acting up- or downstream of this signal  
291 remain largely unknown in a force-response context. Of the three force-responsive genes we have  
292 implicated in tenocyte development, relatives of two of them, *mxra5b*, and *klf2a*, have been linked to  
293 TGF- $\beta$  signaling. Human MXRA5 is downregulated in response to TGF- $\beta$ 1 in the context of inflammation  
294 and fibrosis **(Poveda et al., 2017)**. Several KLF proteins, including KLF2, have been implicated in TGF- $\beta$   
295 signaling in various tissue types **(Boon et al., 2007; Li et al., 2021; Memon et al., 2018)**.

296 Our analyses of *matn1*, *mxra5a* and *klf2a* also hint at specific roles in different subpopulations of  
297 tenocytes subjected to different forces. While *matn1* is expressed in enthesal tenocytes associated  
298 with cartilage, *mxr5a* and *klf2a* expression localizes to tenocytes in the MTJs of axial muscles. We  
299 therefore propose a model in which expression of tenocyte marker genes respond distinctly to varying  
300 muscle contraction force conditions **(Figure 5A-5C)**. In the developing jaw entheses tenocytes increase  
301 *matn1* expression acutely upon sensing of intermittent/acute contraction force (i.e sporadic jaw  
302 contraction during cranial tendon development) **(Figure 5B)**. Conversely, the tenocytes of developing  
303 trunk MTJs bear the stress of two different contraction conditions: intermittent sporadic trunk  
304 contraction forces such as those observed during 36 hpf embryos or during “Twitching” recovery of  
305 muscle contraction from  $\alpha$ Btx-injection induced paralysis, and continuous contractions, such as those

306 required during maintenance of posture along the anteroposterior axis. Trunk MTJ tenocytes  
307 downregulate *klf2a* expression in both intermittent and continuous force conditions, whereas *mxra5b*  
308 expression is increased in only continuous force conditions (**Figure 5A, 5C**). These contextual differences  
309 in force-response may reflect the intricate nature of fine-tuning spatially distinct tendon ECM structures  
310 and functions during diverse biological processes like development, maintenance and repair. To address  
311 functions of these genes we have used CRISPR/Cas9 mutagenesis to generate F0 Crispants for *matn1*,  
312 *klf2a* and *mxra5b*, but have not observed any obvious phenotypic defects, possibly due to genetic  
313 redundancy with other similar proteins, or compensation. Generating stable mutant lines and testing  
314 their requirements in tenocytes such as changes in response to varying mechanical forces (Schilling and  
315 Subramanian, 2014) is an important avenue of future study.

316           Whereas bulk RNA sequencing strategies such as those performed here provide deeper read  
317 depth for identification of sparsely expressed genes, they may miss critical cell types and specific  
318 expression patterns necessary to interpret complex processes occurring in tendons during  
319 morphogenesis. Single-cell approaches (e.g. scRNA-seq) at different developmental stages and in the  
320 presence or absence of force, will provide a clearer understanding of how individual cells and cell  
321 populations respond to force in development. Integrating such knowledge of the basic biology of  
322 tenocytes at multiple scales will be essential for optimizing translational therapies in the future.

323

## 324 **Figure Legends**

325 **Figure 1: Genes differentially expressed in tendon progenitor cells upon onset of embryonic muscle**  
326 **contraction**



327 **A)** Heatmap from bulk RNA-seq of FAC-sorted *scxa:mCherry+* tenocytes displaying 1,123 genes  
328 differentially expressed between 36 hpf and 48 hpf. FDR adjusted  $p < 0.05$ . **B)** Elevated expression of  
329 tenocyte marker genes *mkxa*, *tnmd*, and *egr1* in RNA-seq experiments at 48 hpf. Datapoints represent  
330 normalized read counts of single biological replicates for each color-coded timepoint (n=7 for 36 hpf,  
331 n=4 for 48 hpf). **C)** PCAs of individual replicates showing separation of experimental conditions by  
332 timepoint. **D)** GO analysis using Biological Process (BP) terms of top 1,123 differentially expressed genes  
333 (DEGs) by adjusted p-value.

334

### 335 **Figure 2: Embryonic expression of novel tenocyte progenitor markers**

336 Expression of *matn1*, *klf2a* and *mxra5b* mRNA detected by whole mount ISH. **(A-C)** *matn1* expression in  
337 skeletal progenitors at 48 hpf **(A)** and in pharyngeal, neurocranial and pectoral fin cartilages (and  
338 associated tenocytes) at 60 hpf **(B,C)**. **(A,B)** Lateral views. **(C)** Ventral view. **(D-F)** *klf2a* expression in  
339 pharyngeal mesenchyme at 36 hpf **(D)**, skeletal progenitors and in tenocytes along somite boundaries  
340 (sb) at 48 and 60 hpf **(E,F)**. Lateral views. **(G-I)** *mxra5b* expression in tenocytes along somite boundaries  
341 and the notochord at 36, 48 and 60 hpf. Scale bars = 100 $\mu$ m. Abbreviations: abc = anterior basicranial  
342 commissure, ch = ceratohyal cartilage, ep = ethmoid plate, hs = hyosymplectic cartilage, mc = meckel's  
343 cartilage, nc = notochord, pf = pectoral fin, pq = palatoquadrate cartilage, sb = somite boundaries, t =  
344 trabeculae cartilage.

345

### 346 **Figure 3: Co-expression of *matn1*, *klf2a* and *mxra5b* with *scxa* in tenocytes**

347 Expression of *matn1*, *klf2a*, and *mxra5b* (green) and *scxa* (red) detected by whole mount *isHCR*. **(A-E)**  
348 *matn1* co-localizes with *scxa* at muscle attachment sites on developing pharyngeal cartilages at 72 hpf.

349 Ventral view, anterior to the left. **(D, E)** Higher magnification confocal images of the lower and upper  
350 dashed boxes in **A**, respectively. **(F-H)** *klf2a* co-localizes with *scxa* at somite boundaries at 48 hpf. Lateral  
351 views, anterior to the left. **(I, J)** Higher magnification confocal images of somite boundaries regions  
352 indicated by left and right dashed boxes in **(F)**. **(K-M)** *mxra5b* co-localizes with *scxa* at somite  
353 boundaries, particularly along the horizontal myoseptum, at 48 hpf. Lateral views, anterior to the left.  
354 **(N, O)** Higher magnification confocal images of somite boundaries of left and right dashed boxes in **K**.  
355 Abbreviations: ch = ceratohyal cartilage, ch-ih (a) = anterior ceratohyal-interhyal attachment, ch-ih (p) =  
356 posterior ceratohyal-interhyal attachment, ch-hh = ceratohyal-hyohyal attachment, HMS = horizontal  
357 myoseptum, hs = hyosymplectic cartilage, mc = meckels cartilage, pq = palatoquadrate cartilage, sb =  
358 somite boundaries, sv = segmental blood vessels. Arrowheads and dashed circles in **D, E, I, J, N, O**  
359 indicate examples of co-expressing cells from which individual cell substacks were quantified. Scale bars  
360 = 50 $\mu$ m

361

#### 362 **Figure 4: Expression dynamics of *matn1*, *klf2a*, and *mxra5b* in response to force perturbations**

363 **(A-C)** Plots of *matn1*, *klf2a*, and *mxra5b* normalized read counts from RNA-seq at the onset of zebrafish  
364 active muscle contraction at 36 hpf (red) and at 48 hpf (blue). Each point represents a single biological  
365 replicate. **(D, E)** Histograms quantifying RT-qPCR data from WT control (blue bars) and *cacnb1*<sup>-/-</sup> mutants  
366 (red bars) at 48 hpf **(D)** and 72hpf **(E)**. RT-qPCR of *matn1*, *klf2a*, and *mxra5b* in uninjected WT controls  
367 (blue bars) and  $\alpha$ Btx-injected paralyzed (green bars) embryos at 48 hpf **(F)**, in  $\alpha$ Btx-injected paralyzed  
368 (green bars) and  $\alpha$ Btx-injected “Twitching” (partially recovered, magenta bars) embryos at 48 hpf **(G)**,  
369 and in WT controls (green bars) and  $\alpha$ Btx-injected, “Recovered” (blue bars) embryos at 48 hpf **(H)**. **(I-K)**  
370 Box plots of fluorescence intensity/area measurements from individual cell confocal substacks labeled  
371 for *matn1/scxa* **(I)**, *klf2a/scxa* **(J)** and *mxra5b/scxa* **(K)** RNA with *isHCR* in WT controls (red),  $\alpha$ Btx-

372 injected, paralyzed (green), twitching (blue) and recovered (magenta) embryos at 72hpf. By gene and  
373 condition, the sample numbers are as follows: for *matn1*, WT: n = 3 embryos, 30 cells; Paralyzed: n = 4  
374 embryos, 30 cells; Twitching: n = 5 embryos, 40 cells; Recovered: 3 embryos, 30 cells; For *klf2a*, WT: n =  
375 5 embryos, 39 cells; Paralyzed: n = 6 embryos, 20 cells; Twitching: n = 5 embryos, 33 cells; Recovered: 3  
376 embryos, 15 cells; For *mxra5b*, WT: n = 3 embryos, 30 cells; Paralyzed: n = 4 embryos, 40 cells;  
377 Twitching: n = 4 embryos, 40 cells; Recovered: 4 embryos, 40 cells. ns = not significant, \* p < 0.05, \*\* p <  
378 0.01, \*\*\* p < 0.001.

379 **Figure 5: Proposed model for context-specific expression patterns of *matn1*, *klf2a*, and *mxra5b* across**  
380 **distinct tendon attachment regions.**

381 **A-B)** Tendons from spatially separate regions must undergo unique force conditions. Whereas cranial  
382 jaw enthesal tenocytes may experience more acute forces from jaw contractions, tenocytes of the MTJ  
383 may experience both acute and continuous forces from activities such as swimming and posture  
384 maintenance respectively. **C)** Acute muscle contraction conditions cause upregulation of *matn1* in  
385 enthesal tenocytes, whereas trunk MTJ tenocytes downregulate *klf2a* expression in acute and  
386 continuous contraction conditions, while only upregulating *mxra5b* in continuous force conditions.

387 **Supplementary Table 1: Pathway list from differentially expressed genes using PANTHER**

388

389 **Supplementary Table 2: KEGG pathways analyzed from differentially expressed genes using DAVID**

390

391 **Supplementary Table 3: Primer sequences (5' -> 3') used for ISH and RT-qPCR**

392

393 **Supplementary Data 1: Differentially expressed genes from RNA-seq between 36 and 48 hpf**

394 Columns are as follows (standard DESeq2 output): baseMean = normalized count mean for all samples,  
395 Log2FoldChange = log2 fold change 36 hpf vs 48 hpf, lfcSE = standard error 36 hpf vs 48 hpf, stat = Wald  
396 statistic 36 hpf vs 48 hpf, pvalue = Wald test p-value, 36 hpf vs 48 hpf, padj = Benjamini Hochberg FDR  
397 adjusted p-value.

398

399 **Supplementary Figure 1: RNA-seq GO term analyses for Molecular Function (MF) and Cellular  
400 Compartment (CC) GO categories**

401 **A)** MF GO term analysis from 1,123 DEG list by FDR adj. p-value with  $p < 0.05$ . **B)** CC GO term analysis  
402 from top 1,123 DEG list by FDR adj.  $p < 0.05$

403

404 **Supplementary Figure 2: *matn1* expression in the embryonic zebrafish craniofacial complex and  
405 associated tendons and muscles**

406 **(A-C)** *isHCR* for *matn1* (green) and *scxa* (red) in 51 hpf zebrafish embryos, ventral views, anterior to the  
407 left. **(D-G)** Immunolabeling for mCherry in *Tg(scxa:mCherry;sox10:GFP)* embryos (red, tendon), GFP  
408 (green, cartilage) and Myosin Heavy Chain (blue, muscle) at 72 hpf. White-dashed boxes depict  
409 ceratohyal-interhyal and ceratohyal-hyohyal attachment regions measured in *isHCRs* in **Fig. 4I**.

410 Abbreviations: ch = ceratohyal cartilage, ch-ih (a) = anterior ceratohyal-interhyal attachment region, ch-  
411 ih (p) = posterior ceratohyal-interhyal attachment region, mc = meckel's cartilage, pq = palatoquadrate  
412 cartilage, Scale bars = 20um

413

414

## 415 **Methods**

### 416 **Zebrafish embryos, transgenics and mutants**

417 AB strain wild type, *TgBAC(scxa:mCherry)<sup>fb301</sup>* (referred to in this paper as *Tg(scxa:mCherry)*), or *cacnb1-*  
418 *ir1092/ir109;fb301Tg* (referred to in this paper as *cacnb1<sup>-/-</sup>*) transgenic zebrafish embryos were collected in  
419 natural matings, raised in embryo medium at 28.5°C (**Westerfield, 2007**) and staged as described  
420 (**Kimmel et al., 1995**). Craniofacial musculoskeletal structures were identified as described (**Schilling and**  
421 **Kimmel, 1997**). All protocols performed on embryos and adult zebrafish in this study had prior IACUC  
422 approval.

### 423 **In situ hybridization (ISH)**

424 Antisense RNA probes for *matn1*, *klf2a*, and *mxra5b* were generated using T7 sequence-tagged primers  
425 (**Supplementary Table 3**) to amplify from cDNA, reverse transcribed using the ProtoScript II First Strand  
426 cDNA Synthesis Kit (NEB E6560), from 72 hpf WT embryos and synthesized using T7 RNA polymerase  
427 (Roche, 10881767001) and DIG RNA labelling mix (Roche, 11277073910). Whole-mount ISH was  
428 performed with anti-DIG-AP fragments (Roche, 11093274910) at 1:2000 dilution, as described in **Thisse**  
429 **et al., 1993**.

### 430 **In situ hybridization chain reaction (isHCR) and immunohistochemistry**

431 *isHCR* probes were designed by Molecular Technologies (Los Angeles, CA) and whole mount *isHCR* was  
432 performed with amplifiers/probes obtained from Molecular Instruments according to the *isHCR* v3.0  
433 protocol as described (**Choi et al., 2014**). Probes/amplifier combinations used were: *matn1* (NCBI ref. #  
434 403023) and *mxra5b* (NCBI ref. # 795448) in B1 with B1 Alexa Fluor 488, *scxa* (NCBI ref. # 100034489) in  
435 B2 with B2 Alexa Fluor 546, *klf2a* (NCBI ref. # 117508) in B3 with B3 Alexa Fluor 647. Whole embryo  
436 immunohistochemistry was performed as described in **Subramanian et al., 2018**. Primary antibodies

437 used: rat monoclonal anti-mCherry (Molecular Probes – 1:500 dilution, M11217), chicken anti-GFP  
438 (Abcam – 1:1000 dilution, ab13970), mouse anti-myosin heavy chain (MHC) (Developmental Hybridoma  
439 - 1:250, A1025). Secondary antibodies used: Alexa Fluor 594 conjugated donkey anti-rat IgG (Jackson  
440 ImmunoResearch – 1:1000 dilution, 712-586-153), Alexa Fluor 488 conjugated donkey anti-chicken IgY  
441 (Jackson ImmunoResearch, 1:1000 dilution, 703-486-155), Alexa Fluor 647 conjugated donkey anti-  
442 mouse IgG (Jackson ImmunoResearch, 1:1000 dilution, 715-606-151).

#### 443 **Collagenase dissociation and FACS sorting**

444 Transgenic *Tg(scxa:mCherry)* zebrafish embryos were dissociated using collagenase IV (Roche,  
445 17104019) at a concentration of 6.25 mg/ml without trypsin addition at a temperature of 28C for  
446 roughly 40 minutes, homogenizing every 5 min using a P1000 pipette. Cells were then filtered through a  
447 40µm filter (Pluriselect-usa, 43-10040-50). Dissociated cell suspensions were sorted on a Bio-Rad FACS  
448 Aria II cell sorter. mCherry-positive cells were gated and sorted for those expressing at high levels.

#### 449 **Bulk RNA-seq library preparation and sequencing**

450 An RNEasy Micro Kit (Qiagen, 74004) was used for RNA extraction of cell lysates from FAC-sorted cells.  
451 RNA quality was checked at the UC Irvine Genomics High Throughput Facility (GHTF) using a Bioanalyzer  
452 2100 Instrument (Agilent). Biological replicates with RNA Integrity Number (RIN) > 7 were used for  
453 library construction and sequencing. The Smart-seq2 protocol was utilized for cDNA library construction  
454 (**Picelli et al. 2014**). Libraries were sequenced at the GHTF using a HiSeq 4000 sequencer (Illumina) at a  
455 read depth of ~35M reads per replicate.

#### 456 **Bulk RNA-seq data analysis**

457 Reads were mapped to zebrafish genome version GRCz10 and quantified using STAR v2.5.2a (**Dobin et**  
458 **al. 2013**) and RSEM v1.2.31 (**Li and Dewey 2011**). Differential gene expression analysis and PCA were

459 performed using R package DESeq2 v1.30.1. Pairwise comparisons were performed between 36 hpf and  
460 48 hpf sorted tenocytes, and a Benjamini-Hochberg FDR adjusted p-value < 0.05 was used as a threshold  
461 for considering significant differences in gene expression levels. PCA was performed on normalized  
462 count data which underwent variance-stabilization-transformation using DESeq2. Heatmaps were  
463 generated using ClustVis (**Metsalu and Vilo, 2015**). GO term enrichment analysis was performed using  
464 the ClusterProfiler R package (**Wu et al., 2021**). In GO term plots, Gene Ratios are described as  $k/n$   
465 where  $k$  is the number of genes from the input list of DEGs mapping to the given GO term and  $n$  is the  
466 total number of input genes mapping to any GO term.

#### 467 **αBTX injections**

468 αBTX mRNA was synthesized from the *Pmtb-t7-alpha-bungarotoxin* vector (Megason lab, Addgene,  
469 69542) as described in **Swinburne et al. 2015** and injected into embryos at the 1-cell stage at a volume  
470 of 500 picoliters per embryo. αBTX mRNA was injected at a concentration of 90 ng/μl to paralyze  
471 embryos that were collected at 48 hpf and 150 ng/μl to paralyze embryos that were collected at 72 hpf.

#### 472 **RT-qPCR**

473 Wild type, *cacnb1*<sup>-/-</sup>, αBtx-paralyzed, twitching, and recovered embryos were collected at respective  
474 timepoints, homogenized in Trizol with prefilled tube kits using high impact zirconium beads  
475 (Benchmark Scientific, D1032-10) using a BeadBug 3 Microtube Homogenizer D1030 (Benchmark  
476 Scientific), and RNA was extracted using Trizol according to the standard protocol (Invitrogen  
477 15596018). cDNA synthesis was carried out with a standard oligo-dT primer protocol using the  
478 ProtoScript II First Strand cDNA Synthesis Kit (NEB E6560). RNA concentrations were normalized  
479 between samples prior to reverse transcription. cDNA was diluted 1:25 in water and used as template  
480 for RT-qPCR using the Luna Universal qPCR master mix (NEB M3003S). Primers used are listed in  
481 **Supplementary Table 3**. Primer efficiencies were calculated with the formula  $\text{PCR-efficiency} = 10^{(-1/\text{slope})}$

482 from a linear regression of Cp/ln(DNA) using a serial dilution of each primer with 72 hpf embryo cDNA as  
483 described in **Pfaff, 2001**. PCR reactions were performed on a LightCycler 480 II Real Time PCR Instrument  
484 (Roche) and analyzed using LightCycler 480 Software. Each RT-qPCR experiment was repeated in  
485 triplicate for each biological replicate, and at least two biological replicates were used for each analysis.  
486 P-values were calculated using a two-tailed Student's T-test with  $\alpha = 0.05$  in Microsoft Excel. Bar charts  
487 in **Figure 4** present mean +/- standard error.

#### 488 **Automated literature screen**

489 A python script was written to obtain mouse, rat, and human orthologs for a list of zebrafish gene  
490 ENSEMBL IDs by obtaining ortholog information relative to each species from BioMart (**Smedley et al.**  
491 **2009**) and using these downloaded lists as a local database. Once the orthologs were placed in a  
492 separate Excel file adjacent to the zebrafish genes, the script obtained GenBank gene names/symbols  
493 for all genes and orthologs. Lastly, the script identified the number of PubMed articles containing both  
494 the GenBank gene name and keyword input search term by sending GET requests to the NCBI Entrez E-  
495 utilities API (**Sayers, 2010**). In our literature screen, the DEG list of 1,123 genes with FDR adj.  $p < 0.05$  was  
496 used as input with keyword search terms "TGF beta", "Retinoic Acid", "YAP TAZ", and "Piezo". This code  
497 has been deposited on GitHub and is publicly available. The URL for the GitHub repository is provided  
498 here: [https://github.com/tschilling-lab/Litscreen\\_Nayak\\_2022](https://github.com/tschilling-lab/Litscreen_Nayak_2022)

#### 499 **Imaging and *is*HCR quantification**

500 Whole embryos imaged for ISH were mounted on slides in 80% glycerol and imaged using a Zeiss  
501 Axioplan 2 compound microscope utilizing an AxioCam 305 Color Micropublisher 5.0 RTV camera with  
502 Zeiss Zen 3.1 (blue edition) software. Embryos imaged for *is*HCR were embedded in 1% low melting  
503 point agarose/5x SSC and imaged on a Leica SP8 confocal microscope using the PL APO CS2 40X/1.10 W  
504 objective. *is*HCR single cell quantification was performed in ImageJ 1.52p using DAPI as a nuclear



505 marker. Embryo imaging for a single experiment was performed with identical parameters across  
506 conditions. A substack was created from the top and bottom z-slices of each individual cell displaying co-  
507 expression of genes of interest, and a maximum intensity Z-projection was created using the substack  
508 for each measurement. A ROI of the DAPI-stained nucleus from each Z-projection was traced and pixel-  
509 intensity/area was measured. *matn1/scxa* co-expressing cells measured were located at the ch-ih and  
510 ch-hh attachment sites, at the posterior edge of the ch cartilage. *klf2a/scxa* and *mxra5b/scxa* co-  
511 expressing cells measured were located at the boundaries (myosepta) of somites 16-20. *klf2a/scxa* co-  
512 expression was measured primarily in tenocytes near the horizontal myoseptum (HMS) whereas  
513 *mxra5b/scxa* co-expression was measured primarily from tenocytes in the ventral half of the vertical  
514 myoseptum. All experimental condition data pertaining to each embryo image were kept in a separate  
515 document, cell measurements on images were performed, and condition identities were matched to  
516 images after measurements. All p-values were calculated using one way ANOVA with  $\alpha = 0.05$  and  
517 Tukey-Kramer post-hoc tests for pairwise analyses in Microsoft Excel (ns = not significant, \*  $p < 0.05$ , \*\*  
518  $p < 0.01$ , \*\*\*  $p < 0.001$ ). Box plots in **Figure 4** present median and interquartile range (IQR) with  
519 “whiskers” representing largest/smallest value within  $1.5 \times \text{IQR}$  and individual points beyond “whiskers”  
520 representing outliers (default R ggplot2 geom\_boxplot parameters).

## 521 **Acknowledgements:**

522 We thank Danny Dranow for extensive manuscript review, Lianna Fung and David Tatarakis for  
523 constructive feedback and helpful discussions; Ines Gehring for fish care; and all other members of the  
524 Schilling Lab. Funding sources include NIH grants R01 AR067797, R01 DE013828 and R01 DE030565 to  
525 T.F.S.

## 526 **Author Contributions:**

527 Conceptualization: A.S., T.S., P.N.; Methodology: A.S., T.S., P.N.; Software: P.N.; Validation: P.N., Formal  
528 Analysis: P.N.; Investigation: P.N.; Resources: T.S.; Data curation: P.N.; Writing-original draft: P.N.,  
529 Writing-review and editing: A.S., T.S., P.N.; Visualization: P.N.; Supervision: T.S.; Project administration:  
530 P.N.; Funding acquisition: T.S.

## 531 **References:**

- 532 Akutagawa T, Aoki S, Yamamoto-Rikitake M, Iwakiri R, Fujimoto K, Toda S. Cancer-adipose tissue  
533 interaction and fluid flow synergistically modulate cell kinetics, HER2 expression, and trastuzumab  
534 efficacy in gastric cancer. *Gastric Cancer*. 2018 Nov;21(6):946-955. doi: 10.1007/s10120-018-0829-7.  
535 Epub 2018 Apr 25. PMID: 29696406.
- 536 Anderson DM, George R, Noyes MB, Rowton M, Liu W, Jiang R, Wolfe SA, Wilson-Rawls J, Rawls A.  
537 Characterization of the DNA-binding properties of the Mohawk homeobox transcription factor. *J Biol*  
538 *Chem*. 2012 Oct 12;287(42):35351-35359. doi: 10.1074/jbc.M112.399386. Epub 2012 Aug 24. PMID:  
539 22923612; PMCID: PMC3471766.
- 540 Balakrishnan L, Nirujogi RS, Ahmad S, Bhattacharjee M, Manda SS, Renuse S, Kelkar DS, Subbannayya Y,  
541 Raju R, Goel R, Thomas JK, Kaur N, Dhillon M, Tankala SG, Jois R, Vasdev V, Ramachandra Y,  
542 Sahasrabudhe NA, Prasad TsK, Mohan S, Gowda H, Shankar S, Pandey A. Proteomic analysis of human  
543 osteoarthritis synovial fluid. *Clin Proteomics*. 2014 Feb 17;11(1):6. doi: 10.1186/1559-0275-11-6. PMID:  
544 24533825; PMCID: PMC3942106.
- 545 Berthet E, Chen C, Butcher K, Schneider RA, Alliston T, Amirtharajah M. Smad3 binds Scleraxis and  
546 Mohawk and regulates tendon matrix organization. *J Orthop Res*. 2013 Sep;31(9):1475-83. doi:  
547 10.1002/jor.22382. Epub 2013 May 7. PMID: 23653374; PMCID: PMC3960924.
- 548 Blitz E, Sharir A, Akiyama H, Zelzer E. Tendon-bone attachment unit is formed modularly by a distinct  
549 pool of Scx- and Sox9-positive progenitors. *Development*. 2013 Jul;140(13):2680-90. doi:  
550 10.1242/dev.093906. Epub 2013 May 29. PMID: 23720048.
- 551 Bobzin L, Roberts RR, Chen HJ, Crump JG, Merrill AE. Development and maintenance of tendons and  
552 ligaments. *Development*. 2021 Apr 15;148(8):dev186916. doi: 10.1242/dev.186916. Epub 2021 Apr 16.  
553 PMID: 33913478; PMCID: PMC8077520.
- 554 Boon RA, Fledderus JO, Volger OL, van Wanrooij EJ, Pardali E, Weesie F, Kuiper J, Pannekoek H, ten Dijke  
555 P, Horrevoets AJ. KLF2 suppresses TGF-beta signaling in endothelium through induction of Smad7 and  
556 inhibition of AP-1. *Arterioscler Thromb Vasc Biol*. 2007 Mar;27(3):532-9. doi:  
557 10.1161/01.ATV.0000256466.65450.ce. Epub 2006 Dec 28. PMID: 17194892.
- 558 Boselli F, Freund JB, Vermot J. Blood flow mechanics in cardiovascular development. *Cell Mol Life Sci*.  
559 2015 Jul;72(13):2545-59. doi: 10.1007/s00018-015-1885-3. Epub 2015 Mar 24. PMID: 25801176; PMCID:  
560 PMC4457920.
- 561 Chen Y, Cossman J, Jayasuriya CT, Li X, Guan Y, Fonseca V, Yang K, Charbonneau C, Yu H, Kanbe K, Ma P,  
562 Darling E, Chen Q. Deficient Mechanical Activation of Anabolic Transcripts and Post-Traumatic Cartilage  
563 Degeneration in Matrilin-1 Knockout Mice. *PLoS One*. 2016 Jun 7;11(6):e0156676. doi:  
564 10.1371/journal.pone.0156676. PMID: 27270603; PMCID: PMC4896629.
- 565 Chondrogianni N, de C M Simoes D, Franceschi C, Gonos ES. Cloning of differentially expressed genes in  
566 skin fibroblasts from centenarians. *Biogerontology*. 2004;5(6):401-9. doi: 10.1007/s10522-004-3188-1.  
567 PMID: 15609104.

- 568 Chuang HN, Hsiao KM, Chang HY, Wu CC, Pan H. The homeobox transcription factor *Irx1* negatively  
569 regulates MyoD expression and myoblast differentiation. *FEBS J.* 2014 Jul;281(13):2990-3003. doi:  
570 10.1111/febs.12837. Epub 2014 May 27. PMID: 24814716.
- 571 D'Angelo F, Tiribuzi R, Armentano I, Kenny JM, Martino S, Orlacchio A. Mechanotransduction: tuning  
572 stem cells fate. *J Funct Biomater.* 2011 Jun 21;2(2):67-87. doi: 10.3390/jfb2020067. PMID: 24956164;  
573 PMCID: PMC4030896.
- 574 Dobin A, Davis CA, Schlesinger F, Drenkow J, Zaleski C, Jha S, Batut P, Chaisson M, Gingeras TR. STAR:  
575 ultrafast universal RNA-seq aligner. *Bioinformatics.* 2013 Jan 1;29(1):15-21. doi:  
576 10.1093/bioinformatics/bts635. Epub 2012 Oct 25. PMID: 23104886; PMCID: PMC3530905.
- 577 Gabrielsen A, Lawler PR, Yongzhong W, Steinbrüchel D, Blagoja D, Paulsson-Berne G, Kastrop J, Hansson  
578 GK. Gene expression signals involved in ischemic injury, extracellular matrix composition and fibrosis  
579 defined by global mRNA profiling of the human left ventricular myocardium. *J Mol Cell Cardiol.* 2007  
580 Apr;42(4):870-83. doi: 10.1016/j.yjmcc.2006.12.016. Epub 2007 Jan 8. PMID: 17343875.
- 581 Hamada H. Role of physical forces in embryonic development. *Semin Cell Dev Biol.* 2015 Dec;47-48:88-  
582 91. doi: 10.1016/j.semcdb.2015.10.011. Epub 2015 Oct 22. PMID: 26474539.
- 583 He Y, Chen X, Liu H, Xiao H, Kwapong WR, Mei J. Matrix-remodeling associated 5 as a novel tissue  
584 biomarker predicts poor prognosis in non-small cell lung cancers. *Cancer Biomark.* 2015;15(5):645-51.  
585 doi: 10.3233/CBM-150504. PMID: 26406953.
- 586 Ho LTY, Skiba N, Ullmer C, Rao PV. Lysophosphatidic Acid Induces ECM Production via Activation of the  
587 Mechanosensitive YAP/TAZ Transcriptional Pathway in Trabecular Meshwork Cells. *Invest Ophthalmol*  
588 *Vis Sci.* 2018 Apr 1;59(5):1969-1984. doi: 10.1167/iovs.17-23702. PMID: 29677358; PMCID:  
589 PMC5896423.
- 590 Huang da W, Sherman BT, Lempicki RA. Systematic and integrative analysis of large gene lists using  
591 DAVID bioinformatics resources. *Nat Protoc.* 2009;4(1):44-57. doi: 10.1038/nprot.2008.211. PMID:  
592 19131956
- 593 Ireland D, Harrall R, Curry V, Holloway G, Hackney R, Hazleman B, Riley G. Multiple changes in gene  
594 expression in chronic human Achilles tendinopathy. *Matrix Biol.* 2001 Jun;20(3):159-69. doi:  
595 10.1016/s0945-053x(01)00128-7. PMID: 11420148.
- 596 Kaji, D.A., Montero, A.M., Patel, R. et al. Transcriptional profiling of mESC-derived tendon and  
597 fibrocartilage cell fate switch. *Nat Commun* 12, 4208 (2021). [https://doi.org/10.1038/s41467-021-  
598 24535-5](https://doi.org/10.1038/s41467-021-24535-5)
- 599 Kang JS, Alliston T, Delston R, Derynck R. Repression of Runx2 function by TGF-beta through recruitment  
600 of class II histone deacetylases by Smad3. *EMBO J.* 2005 Jul 20;24(14):2543-55. doi:  
601 10.1038/sj.emboj.7600729. Epub 2005 Jun 30. PMID: 15990875; PMCID: PMC1176457.
- 602 Keller R, Shook D, Skoglund P. The forces that shape embryos: physical aspects of convergent extension  
603 by cell intercalation. *Phys Biol.* 2008 Apr 10;5(1):015007. doi: 10.1088/1478-3975/5/1/015007. PMID:  
604 18403829. Kimmel CB, Ballard WW,
- 605 Kimmel SR, Ullmann B, Schilling TF. Stages of embryonic development of the zebrafish. *Dev Dyn.* 1995  
606 Jul;203(3):253-310. doi: 10.1002/aja.1002030302. PMID: 8589427.

- 607 Kult S, Olender T, Osterwalder M, Markman S, Leshkowitz D, Krief S, Blecher-Gonen R, Ben-Moshe S,  
608 Farack L, Keren-Shaul H, Salame TM, Capellini TD, Itzkovitz S, Amit I, Visel A, Zelzer E. Bi-fated tendon-to-  
609 bone attachment cells are regulated by shared enhancers and KLF transcription factors. *Elife*. 2021 Jan  
610 15;10:e55361. doi: 10.7554/eLife.55361. PMID: 33448926; PMCID: PMC7810463.
- 611 Laue K, Jänicke M, Plaster N, Sonntag C, Hammerschmidt M. Restriction of retinoic acid activity by  
612 Cyp26b1 is required for proper timing and patterning of osteogenesis during zebrafish development.  
613 *Development*. 2008 Nov;135(22):3775-87. doi: 10.1242/dev.021238. Epub 2008 Oct 16. PMID:  
614 18927157; PMCID: PMC3608526.
- 615 Lee JS, Yu Q, Shin JT, Sebzda E, Bertozzi C, Chen M, Mericko P, Stadtfeld M, Zhou D, Cheng L, Graf T,  
616 MacRae CA, Lepore JJ, Lo CW, Kahn ML. Klf2 is an essential regulator of vascular hemodynamic forces in  
617 vivo. *Dev Cell*. 2006 Dec;11(6):845-57. doi: 10.1016/j.devcel.2006.09.006. PMID: 17141159.
- 618 Lee W, Nims RJ, Savadipour A, Zhang Q, Leddy HA, Liu F, McNulty AL, Chen Y, Guilak F, Liedtke WB.  
619 Inflammatory signaling sensitizes Piezo1 mechanotransduction in articular chondrocytes as a pathogenic  
620 feed-forward mechanism in osteoarthritis. *Proc Natl Acad Sci U S A*. 2021 Mar 30;118(13):e2001611118.  
621 doi: 10.1073/pnas.2001611118. PMID: 33758095; PMCID: PMC8020656.
- 622 Li B, Dewey CN. RSEM: accurate transcript quantification from RNA-Seq data with or without a reference  
623 genome. *BMC Bioinformatics*. 2011 Aug 4;12:323. doi: 10.1186/1471-2105-12-323. PMID: 21816040;  
624 PMCID: PMC3163565.
- 625 Li H, Wang Y, Liu J, Chen X, Duan Y, Wang X, Shen Y, Kuang Y, Zhuang T, Tomlinson B, Chan P, Yu Z, Cheng  
626 Y, Zhang L, Liu Z, Zhang Y, Zhao Z, Zhang Q, Liu J. Endothelial Klf2-Foxp1-TGF $\beta$  signal mediates the  
627 inhibitory effects of simvastatin on maladaptive cardiac remodeling. *Theranostics*. 2021 Jan  
628 1;11(4):1609-1625. doi: 10.7150/thno.48153. PMID: 33408770; PMCID: PMC7778601.
- 629 Liu D, Black BL, Derynck R. TGF-beta inhibits muscle differentiation through functional repression of  
630 myogenic transcription factors by Smad3. *Genes Dev*. 2001 Nov 15;15(22):2950-66. doi:  
631 10.1101/gad.925901. PMID: 11711431; PMCID: PMC312830.
- 632 Lorda-Diez CI, Montero JA, Diaz-Mendoza MJ, Garcia-Porrero JA, Hurlé JM. Defining the earliest  
633 transcriptional steps of chondrogenic progenitor specification during the formation of the digits in the  
634 embryonic limb. *PLoS One*. 2011;6(9):e24546. doi: 10.1371/journal.pone.0024546. Epub 2011 Sep 13.  
635 PMID: 21931747; PMCID: PMC3172225.
- 636 Lou W, Liu J, Ding B, Jin L, Xu L, Li X, Chen J, Fan W. Five miRNAs-mediated PIEZO2 downregulation,  
637 accompanied with activation of Hedgehog signaling pathway, predicts poor prognosis of breast cancer.  
638 *Aging (Albany NY)*. 2019 May 6;11(9):2628-2652. doi: 10.18632/aging.101934. PMID: 31058608; PMCID:  
639 PMC6535055.
- 640 Lu HH, Thomopoulos S. Functional attachment of soft tissues to bone: development, healing, and tissue  
641 engineering. *Annu Rev Biomed Eng*. 2013;15:201-26. doi: 10.1146/annurev-bioeng-071910-124656.  
642 Epub 2013 Apr 29. Erratum in: *Annu Rev Biomed Eng*. 2013;15:vi. PMID: 23642244; PMCID:  
643 PMC3925419.
- 644 Maeda T, Sakabe T, Sunaga A, Sakai K, Rivera AL, Keene DR, Sasaki T, Stavnezer E, Iannotti J, Schweitzer  
645 R, Ilic D, Baskaran H, Sakai T. Conversion of mechanical force into TGF- $\beta$ -mediated biochemical signals.

- 646 Curr Biol. 2011 Jun 7;21(11):933-41. doi: 10.1016/j.cub.2011.04.007. Epub 2011 May 19. PMID:  
647 21600772; PMCID: PMC3118584.
- 648 McGurk PD, Swartz ME, Chen JW, Galloway JL, Eberhart JK. In vivo zebrafish morphogenesis shows  
649 Cyp26b1 promotes tendon condensation and musculoskeletal patterning in the embryonic jaw. PLoS  
650 Genet. 2017 Dec 11;13(12):e1007112. doi: 10.1371/journal.pgen.1007112. PMID: 29227993; PMCID:  
651 PMC5739505.
- 652 McNeilly CM, Banes AJ, Benjamin M, Ralphs JR. Tendon cells in vivo form a three dimensional network of  
653 cell processes linked by gap junctions. J Anat. 1996 Dec;189 ( Pt 3)(Pt 3):593-600. Erratum in: J Anat  
654 1997 Apr;190(Pt 3):477-8. PMID: 8982835; PMCID: PMC1167702.
- 655 Memon A, Lee WK. KLF10 as a Tumor Suppressor Gene and Its TGF- $\beta$  Signaling. Cancers (Basel). 2018  
656 May 25;10(6):161. doi: 10.3390/cancers10060161. PMID: 29799499; PMCID: PMC6025274.
- 657 Metsalu T, Vilo J. ClustVis: a web tool for visualizing clustering of multivariate data using Principal  
658 Component Analysis and heatmap. Nucleic Acids Res. 2015 Jul 1;43(W1):W566-70. doi:  
659 10.1093/nar/gkv468. Epub 2015 May 12. PMID: 25969447; PMCID: PMC4489295.
- 660 Mi H, Thomas P. PANTHER pathway: an ontology-based pathway database coupled with data analysis  
661 tools. Methods Mol Biol. 2009;563:123-40. doi: 10.1007/978-1-60761-175-2\_7. PMID: 19597783;  
662 PMCID: PMC6608593
- 663 Pei M, Luo J, Chen Q. Enhancing and maintaining chondrogenesis of synovial fibroblasts by cartilage  
664 extracellular matrix protein matrilins. Osteoarthritis Cartilage. 2008 Sep;16(9):1110-7. doi:  
665 10.1016/j.joca.2007.12.011. Epub 2008 Feb 20. PMID: 18282772; PMCID: PMC2596998.
- 666 Pfaffl MW. A new mathematical model for relative quantification in real-time RT-PCR. Nucleic Acids Res.  
667 2001 May 1;29(9):e45. doi: 10.1093/nar/29.9.e45. PMID: 11328886; PMCID: PMC55695.
- 668 Picelli S, Faridani OR, Björklund AK, Winberg G, Sagasser S, Sandberg R. Full-length RNA-seq from single  
669 cells using Smart-seq2. Nat Protoc. 2014 Jan;9(1):171-81. doi: 10.1038/nprot.2014.006. Epub 2014 Jan 2.  
670 PubMed PMID: 24385147.
- 671 Pingel J, Lu Y, Starborg T, Fredberg U, Langberg H, Nedergaard A, Weis M, Eyre D, Kjaer M, Kadler KE. 3-D  
672 ultrastructure and collagen composition of healthy and overloaded human tendon: evidence of tenocyte  
673 and matrix buckling. J Anat. 2014 May;224(5):548-55. doi: 10.1111/joa.12164. Epub 2014 Feb 9. PMID:  
674 24571576; PMCID: PMC3981497.
- 675 Poveda J, Sanz AB, Fernandez-Fernandez B, Carrasco S, Ruiz-Ortega M, Cannata-Ortiz P, Ortiz A, Sanchez-  
676 Niño MD. MXRA5 is a TGF- $\beta$ 1-regulated human protein with anti-inflammatory and anti-fibrotic  
677 properties. J Cell Mol Med. 2017 Jan;21(1):154-164. doi: 10.1111/jcmm.12953. Epub 2016 Sep 6. PMID:  
678 27599751; PMCID: PMC5192817.
- 679 Pryce BA, Watson SS, Murchison ND, Staverosky JA, Dünker N, Schweitzer R. Recruitment and  
680 maintenance of tendon progenitors by TGFbeta signaling are essential for tendon formation.  
681 Development. 2009 Apr;136(8):1351-61. doi: 10.1242/dev.027342. PMID: 19304887; PMCID:  
682 PMC2687466.
- 683 Riley SE, Feng Y, Hansen CG. Hippo-Yap/Taz signalling in zebrafish regeneration. NPJ Regen Med. 2022  
684 Jan 27;7(1):9. doi: 10.1038/s41536-022-00209-8. PMID: 35087046; PMCID: PMC8795407.

- 685 Robins JE, Capehart AA. Matrix remodeling associated 5 expression in trunk and limb during avian  
686 development. *Int J Dev Biol*. 2018;62(4-5):335-340. doi: 10.1387/ijdb.170225ac. PMID: 29877573.
- 687 Rullman E, Norrbom J, Strömberg A, Wågsäter D, Rundqvist H, Haas T, Gustafsson T. Endurance exercise  
688 activates matrix metalloproteinases in human skeletal muscle. *J Appl Physiol* (1985). 2009  
689 Mar;106(3):804-12. doi: 10.1152/jappphysiol.90872.2008. Epub 2009 Jan 8. PMID: 19131480.
- 690 Sayers E. A General Introduction to the E-utilities. In: *Entrez Programming Utilities Help* [Internet].  
691 Bethesda (MD): National Center for Biotechnology Information (US); 2010-. Available from:  
692 <https://www.ncbi.nlm.nih.gov/books/NBK25497/>
- 693 Schilling TF, Kimmel CB. Musculoskeletal patterning in the pharyngeal segments of the zebrafish  
694 embryo. *Development*. 1997 Aug;124(15):2945-60. doi: 10.1242/dev.124.15.2945. PMID: 9247337.
- 695 Schweitzer R, Zelzer E, Volk T. Connecting muscles to tendons: tendons and musculoskeletal  
696 development in flies and vertebrates. *Development*. 2010 Sep 1;137(17):2807-17. doi:  
697 10.1242/dev.047498. Erratum in: *Development*. 2010 Oct;137(19):3347. PMID: 20699295; PMCID:  
698 PMC2938915.
- 699 Smedley D, Haider S, Ballester B, Holland R, London D, Thorisson G, Kasprzyk A. BioMart--biological  
700 queries made easy. *BMC Genomics*. 2009 Jan 14;10:22. doi: 10.1186/1471-2164-10-22. PMID:  
701 19144180; PMCID: PMC2649164.
- 702 Steed E, Faggianelli N, Roth S, Ramspacher C, Concordet JP, Vermot J. klf2a couples  
703 mechanotransduction and zebrafish valve morphogenesis through fibronectin synthesis. *Nat Commun*.  
704 2016 May 25;7:11646. doi: 10.1038/ncomms11646. PubMed PMID: 27221222; PubMed Central PMCID:  
705 PMC4894956.
- 706 Subramanian A, Kanzaki LF, Galloway JL, Schilling TF. Mechanical force regulates tendon extracellular  
707 matrix organization and tenocyte morphogenesis through TGFbeta signaling. *Elife*. 2018 Nov 26;7. pii:  
708 e38069. doi: 10.7554/eLife.38069. PubMed PMID: 30475205; PubMed Central PMCID: PMC6345564.
- 709 Subramanian A, Schilling TF. Tendon development and musculoskeletal assembly: emerging roles for the  
710 extracellular matrix. *Development*. 2015 Dec 15;142(24):4191-204. doi: 10.1242/dev.114777. PMID:  
711 26672092; PMCID: PMC4689213.
- 712 Subramanian A, Schilling TF. Thrombospondin-4 controls matrix assembly during development and  
713 repair of myotendinous junctions. *Elife*. 2014 Jun 18;3:e02372. doi: 10.7554/eLife.02372. PMID:  
714 24941943; PMCID: PMC4096842.
- 715 Swinburne IA, Mosaliganti KR, Green AA, Megason SG. Improved Long-Term Imaging of Embryos with  
716 Genetically Encoded  $\alpha$ -Bungarotoxin. *PLoS One*. 2015 Aug 5;10(8):e0134005. doi:  
717 10.1371/journal.pone.0134005. PMID: 26244658; PMCID: PMC4526548.
- 718 Thisse C, Thisse B, Schilling TF, Postlethwait JH. Structure of the zebrafish snail1 gene and its expression  
719 in wild-type, spadetail and no tail mutant embryos. *Development*. 1993 Dec;119(4):1203-15. doi:  
720 10.1242/dev.119.4.1203. PMID: 8306883.
- 721 Wang GH, Yao L, Xu HW, Tang WT, Fu JH, Hu XF, Cui L, Xu XM. Identification of MXRA5 as a novel  
722 biomarker in colorectal cancer. *Oncol Lett*. 2013 Feb;5(2):544-548. doi: 10.3892/ol.2012.1038. Epub  
723 2012 Nov 21. PMID: 23420087; PMCID: PMC3573052.

- 724 Wang JH. Mechanobiology of tendon. *J Biomech.* 2006;39(9):1563-82. doi:  
725 10.1016/j.jbiomech.2005.05.011. Epub 2005 Jul 5. PMID: 16000201.
- 726 Westerfield M (2007) *The Zebrafish Book: A Guide for the Laboratory Use of Zebrafish (Danio Rerio (Fifth  
727 edition)* Eugene, Oregon: University of Oregon Press.
- 728 Wu T, Hu E, Xu S, Chen M, Guo P, Dai Z, Feng T, Zhou L, Tang W, Zhan L, Fu X, Liu S, Bo X, Yu G.  
729 clusterProfiler 4.0: A universal enrichment tool for interpreting omics data. *Innovation (N Y).* 2021 Jul  
730 1;2(3):100141. doi: 10.1016/j.xinn.2021.100141. PMID: 34557778; PMCID: PMC8454663.
- 731 Zelzer E, Blitz E, Killian ML, Thomopoulos S. Tendon-to-bone attachment: from development to maturity.  
732 *Birth Defects Res C Embryo Today.* 2014 Mar;102(1):101-12. doi: 10.1002/bdrc.21056. PMID: 24677726;  
733 PMCID: PMC4076491.
- 734 Zhang M, Meng N, Wang X, Chen W, Zhang Q. TRPV4 and PIEZO Channels Mediate the Mechanosensing  
735 of Chondrocytes to the Biomechanical Microenvironment. *Membranes (Basel).* 2022 Feb 18;12(2):237.  
736 doi: 10.3390/membranes12020237. PMID: 35207158; PMCID: PMC8874592.
- 737 Zhou W, Saint-Amant L, Hirata H, Cui WW, Sprague SM, Kuwada JY. Non-sense mutations in the  
738 dihydropyridine receptor beta1 gene, CACNB1, paralyze zebrafish relaxed mutants. *Cell Calcium.* 2006  
739 Mar;39(3):227-36. doi: 10.1016/j.ceca.2005.10.015. Epub 2005 Dec 20. PMID: 16368137.

Figure 1

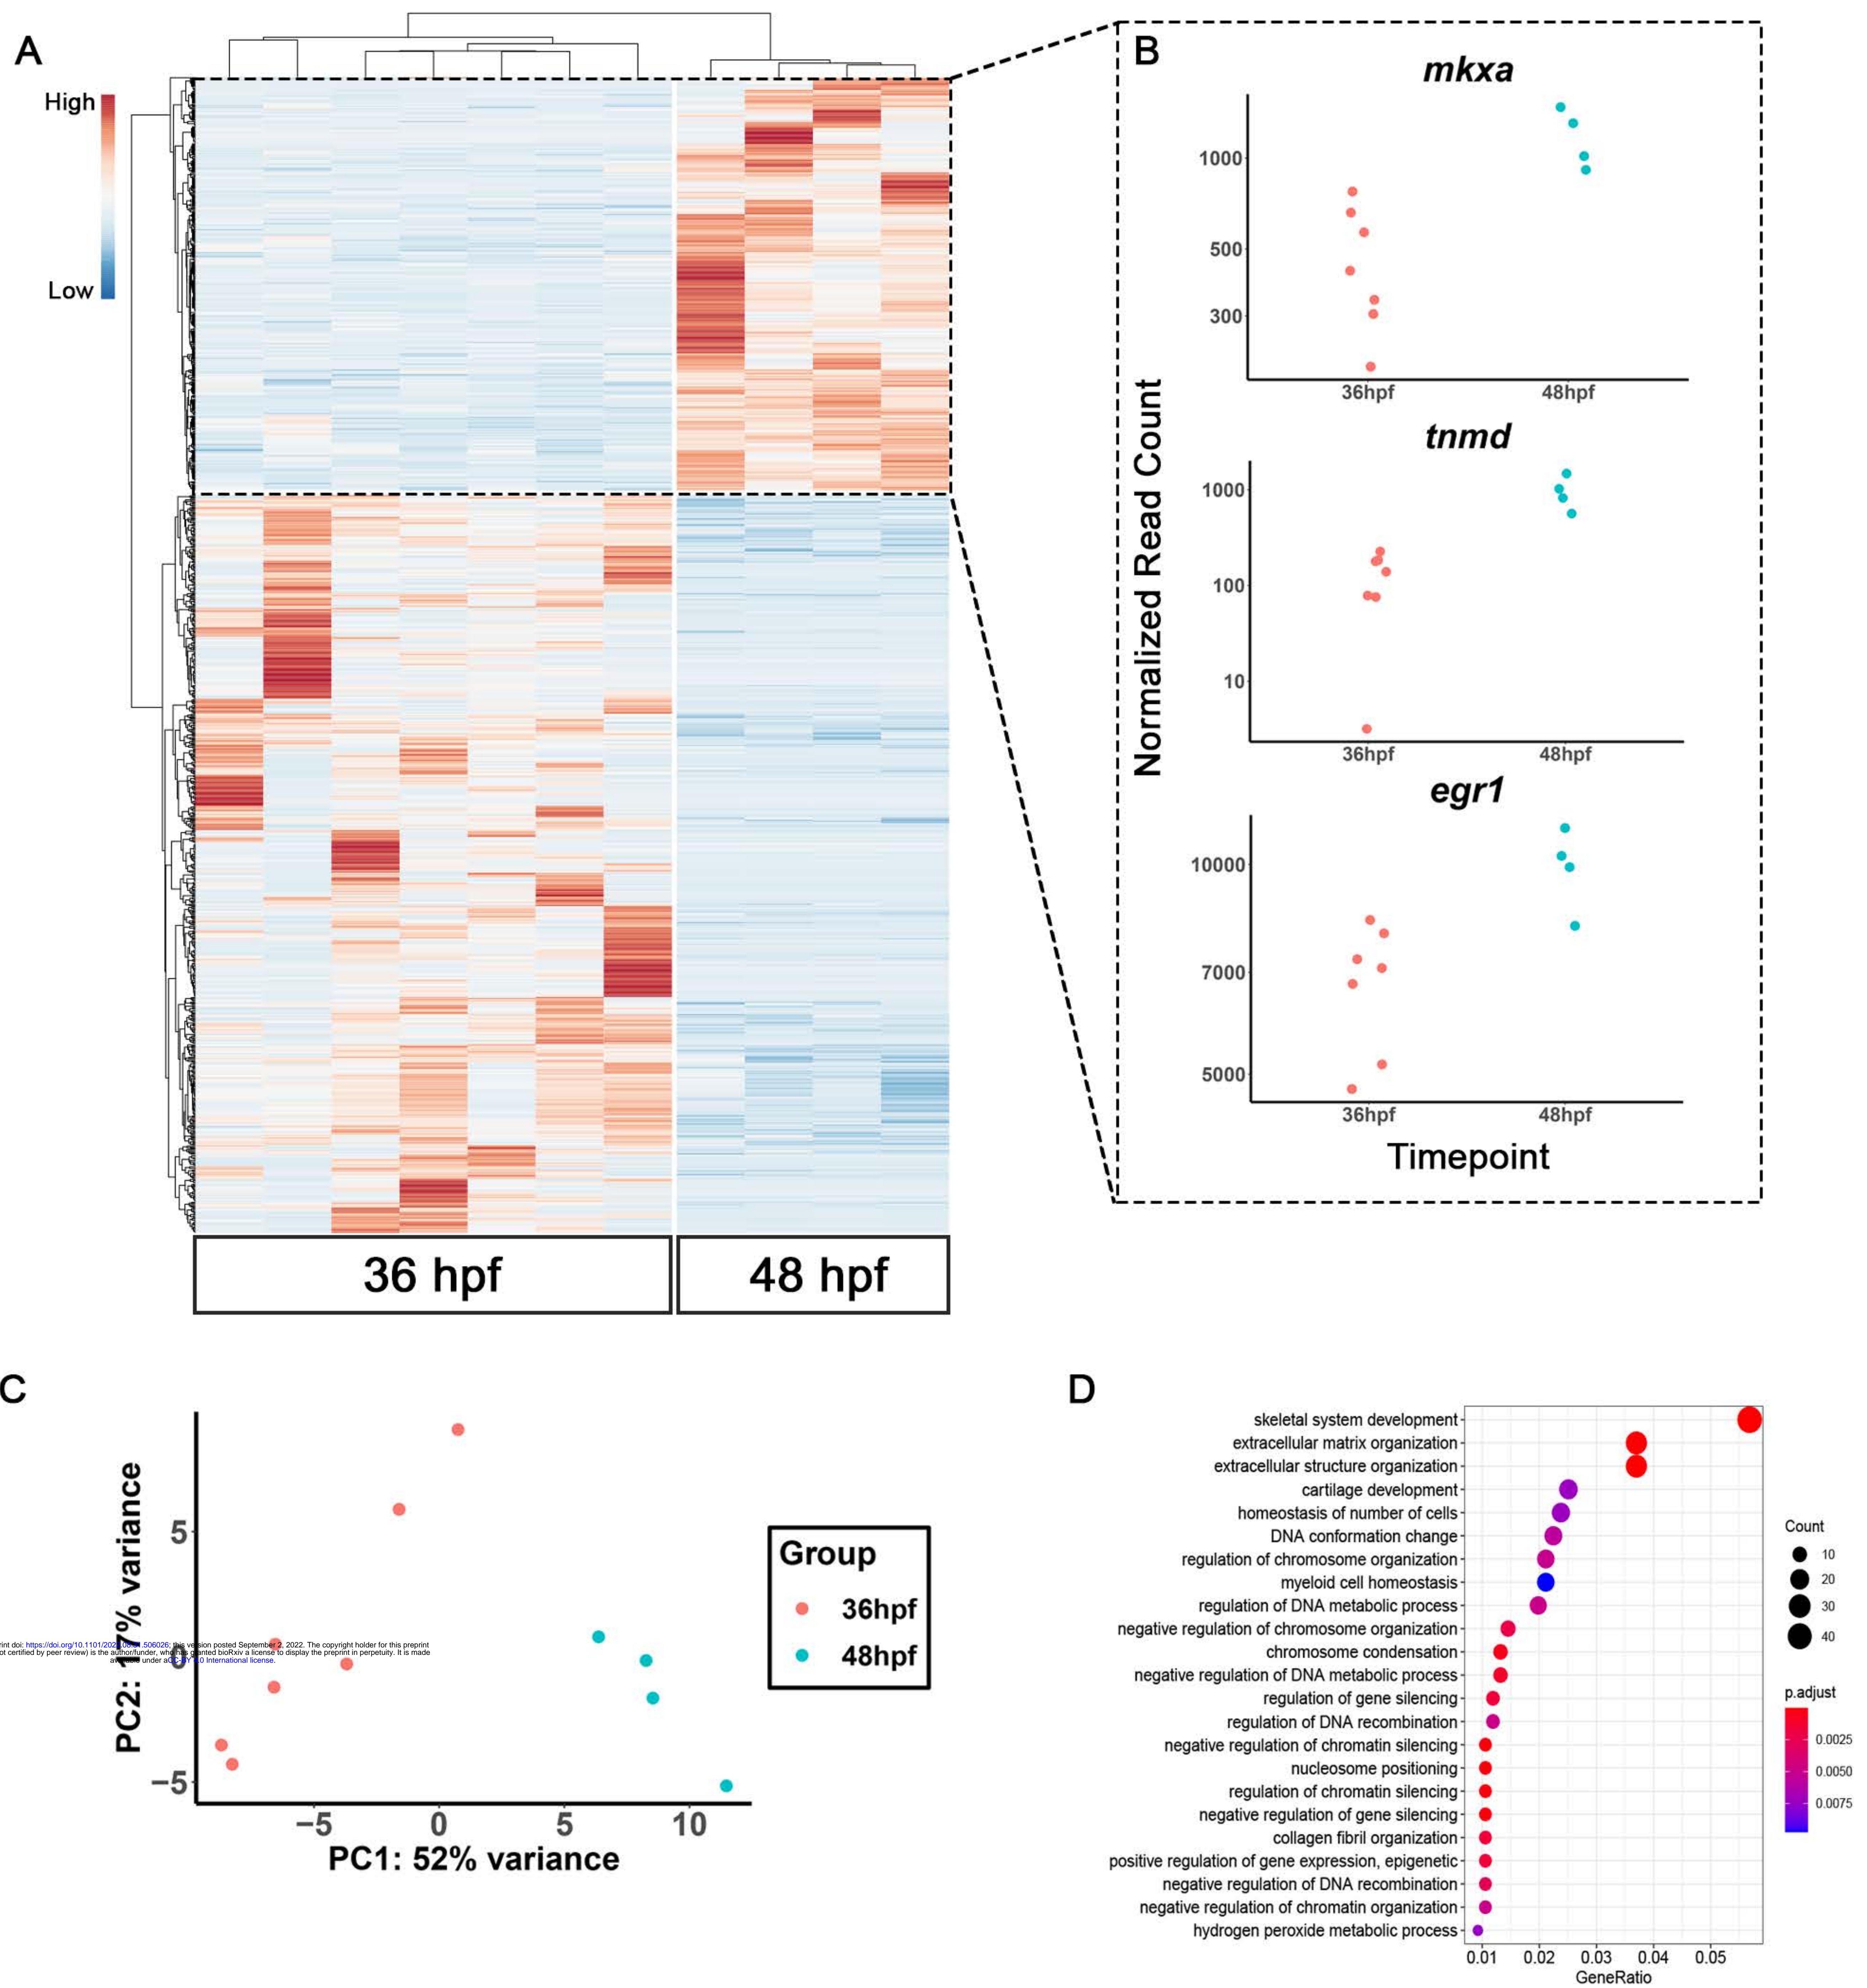



Figure 2

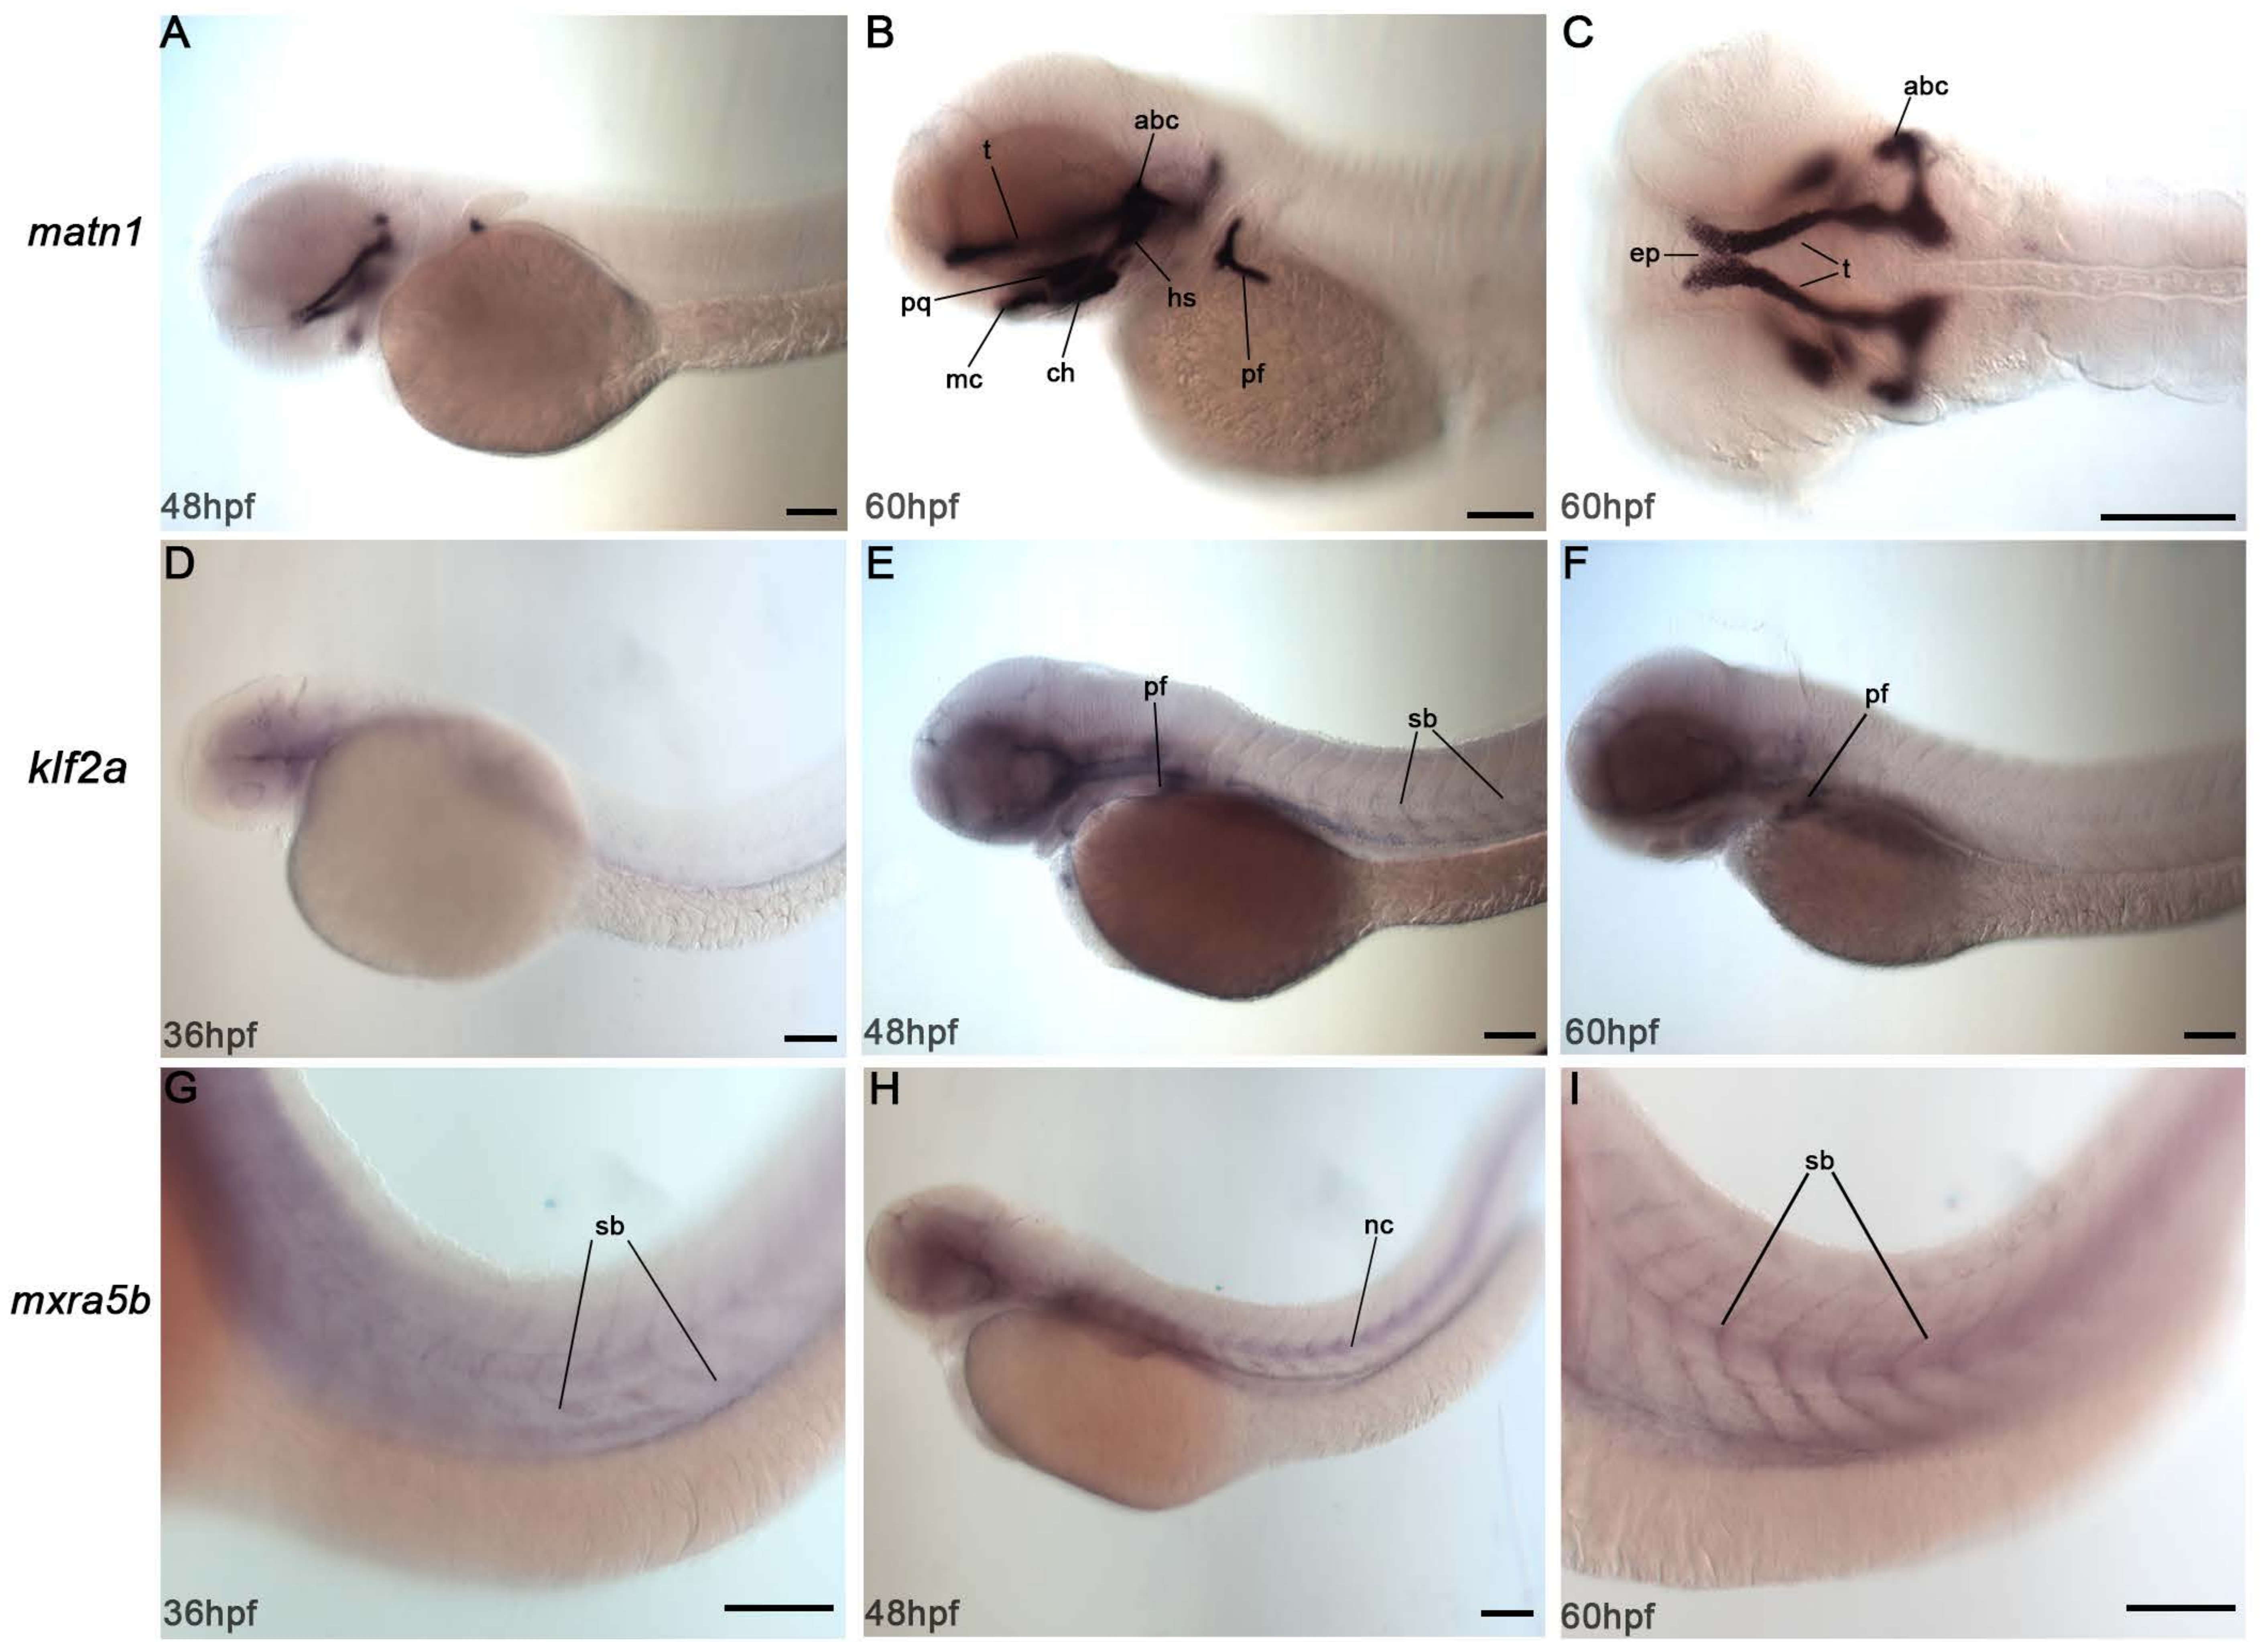

Figure 3

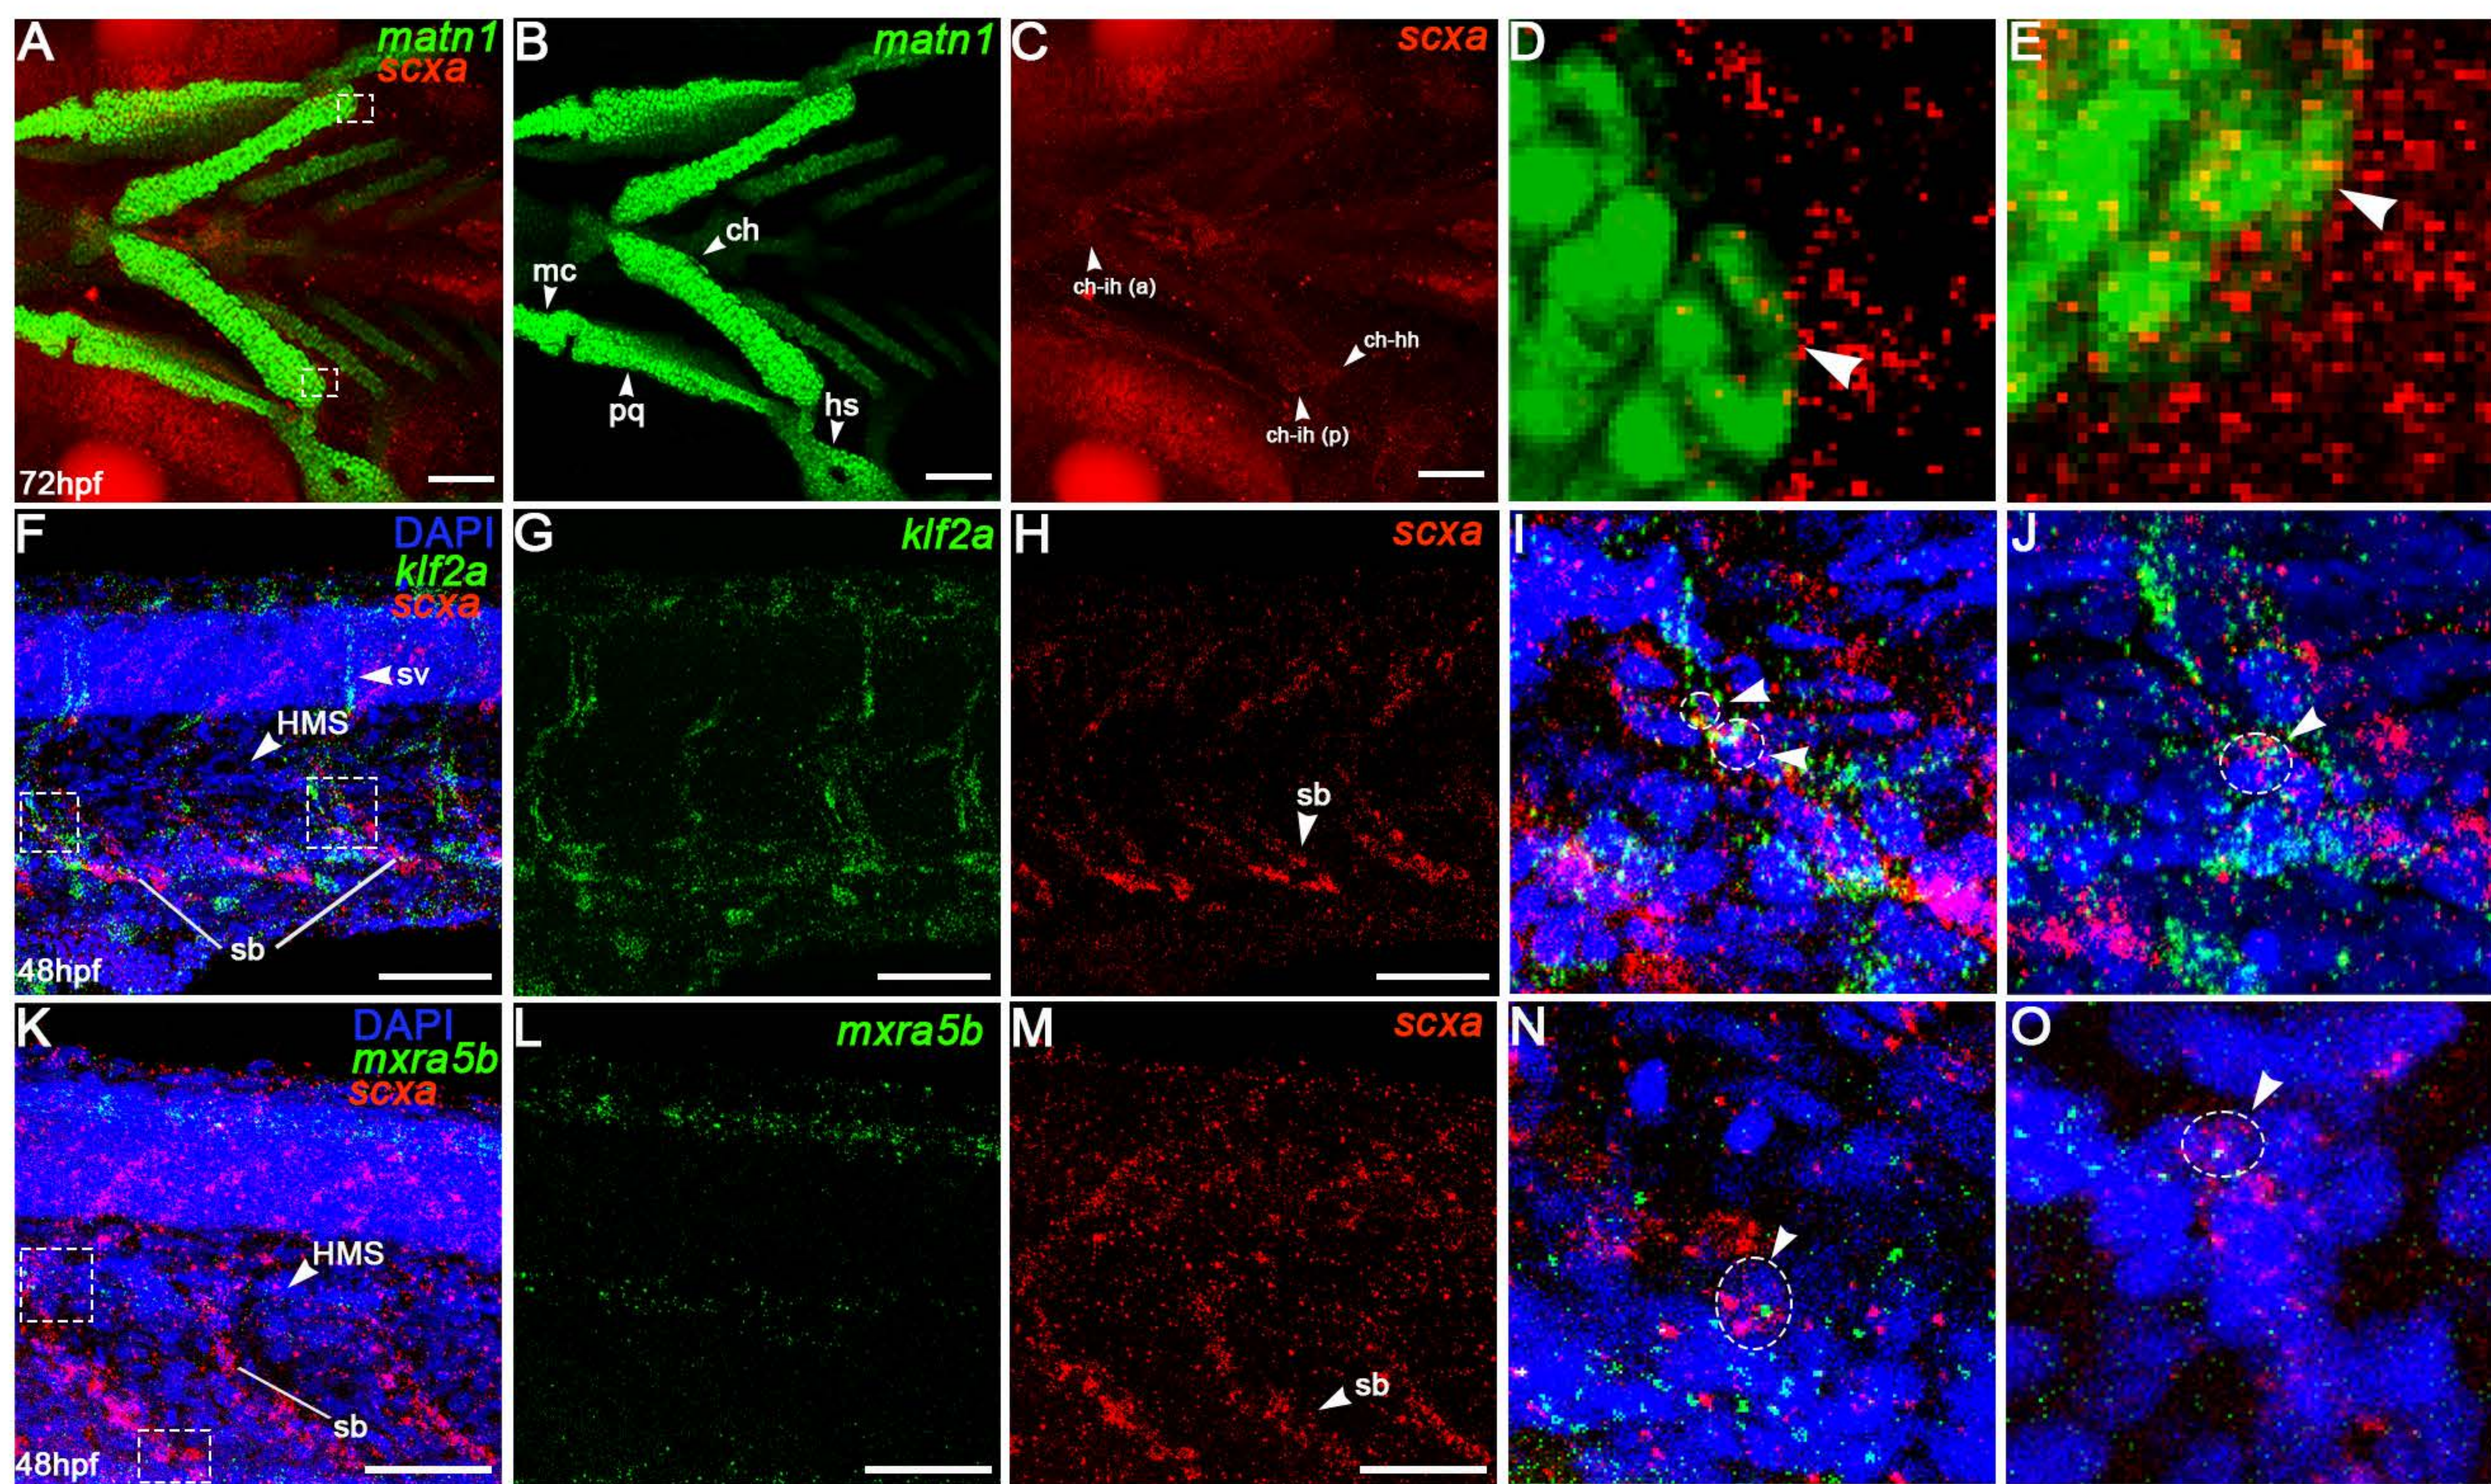

Figure 4

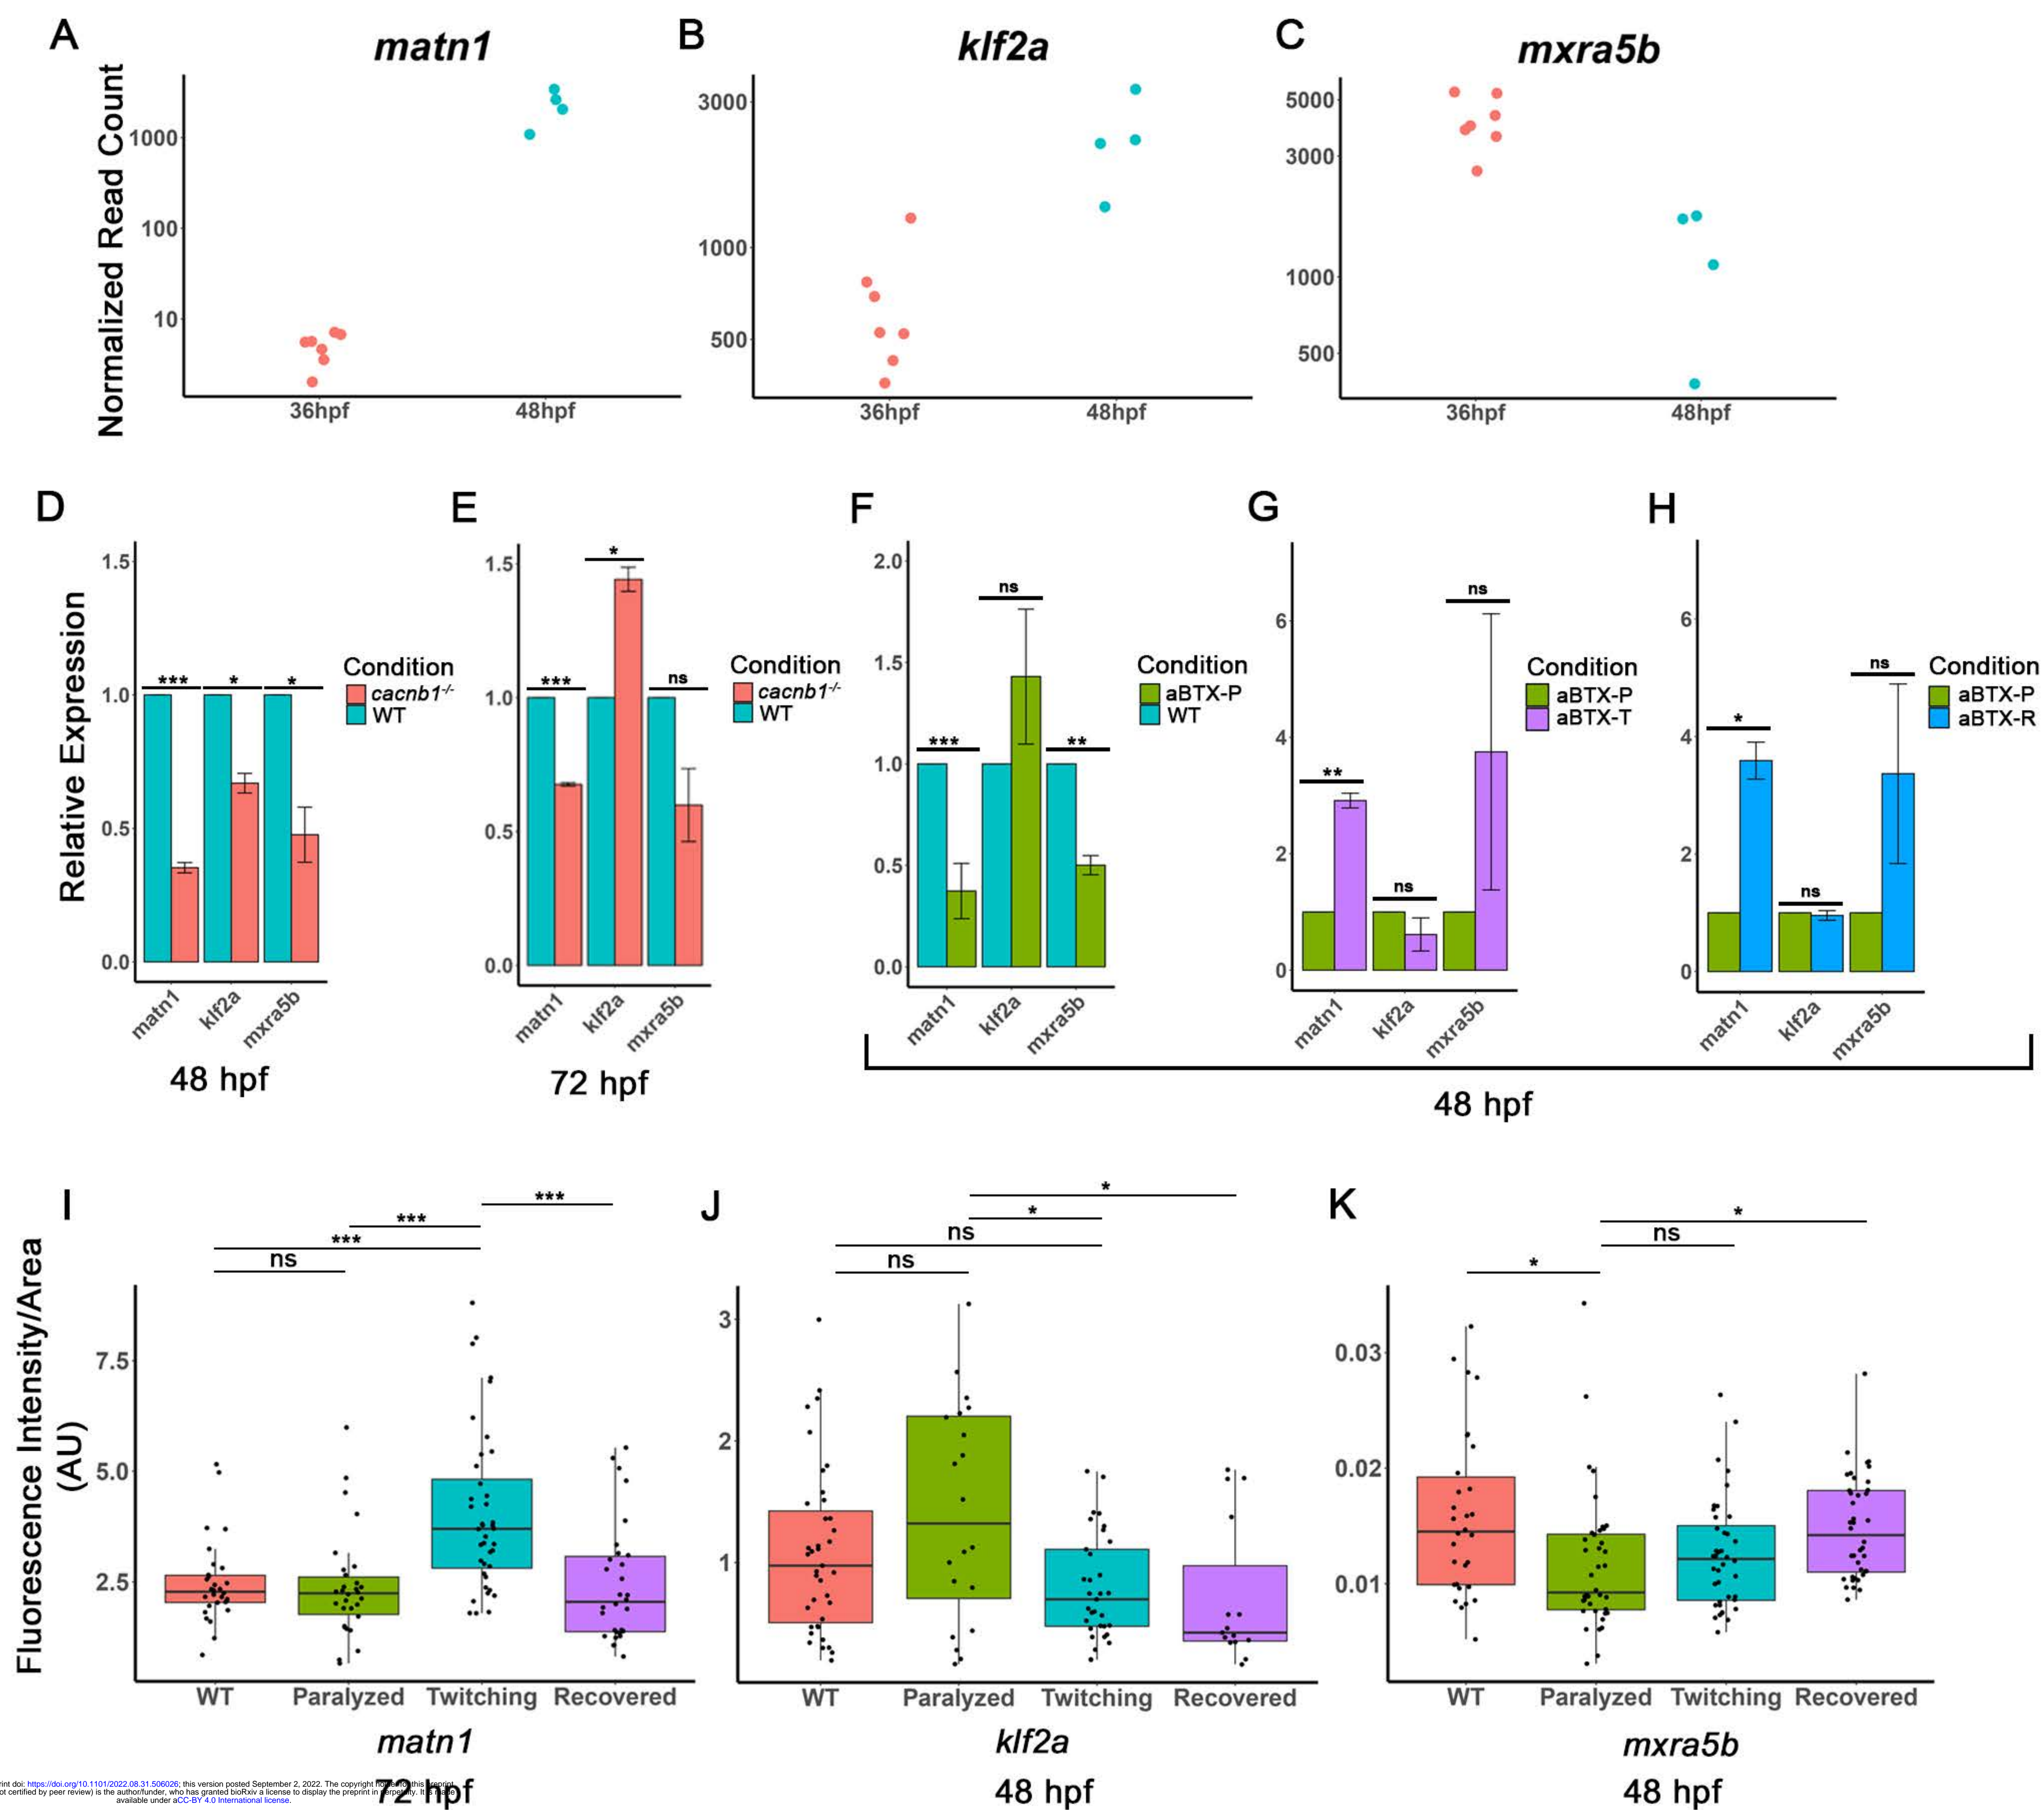

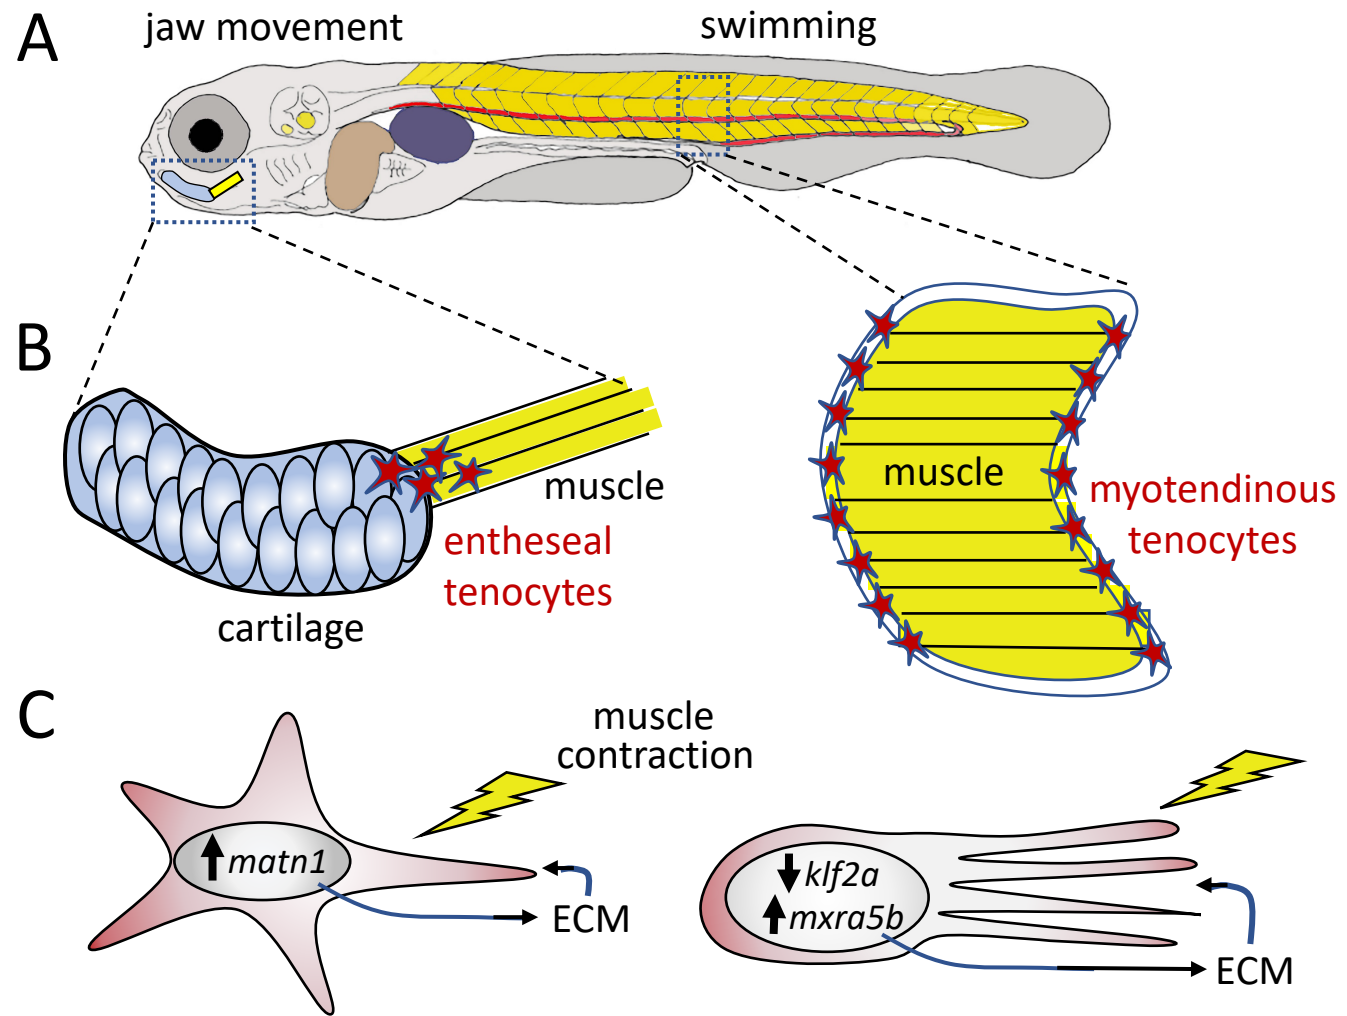

# Supplementary Figure 1

## A

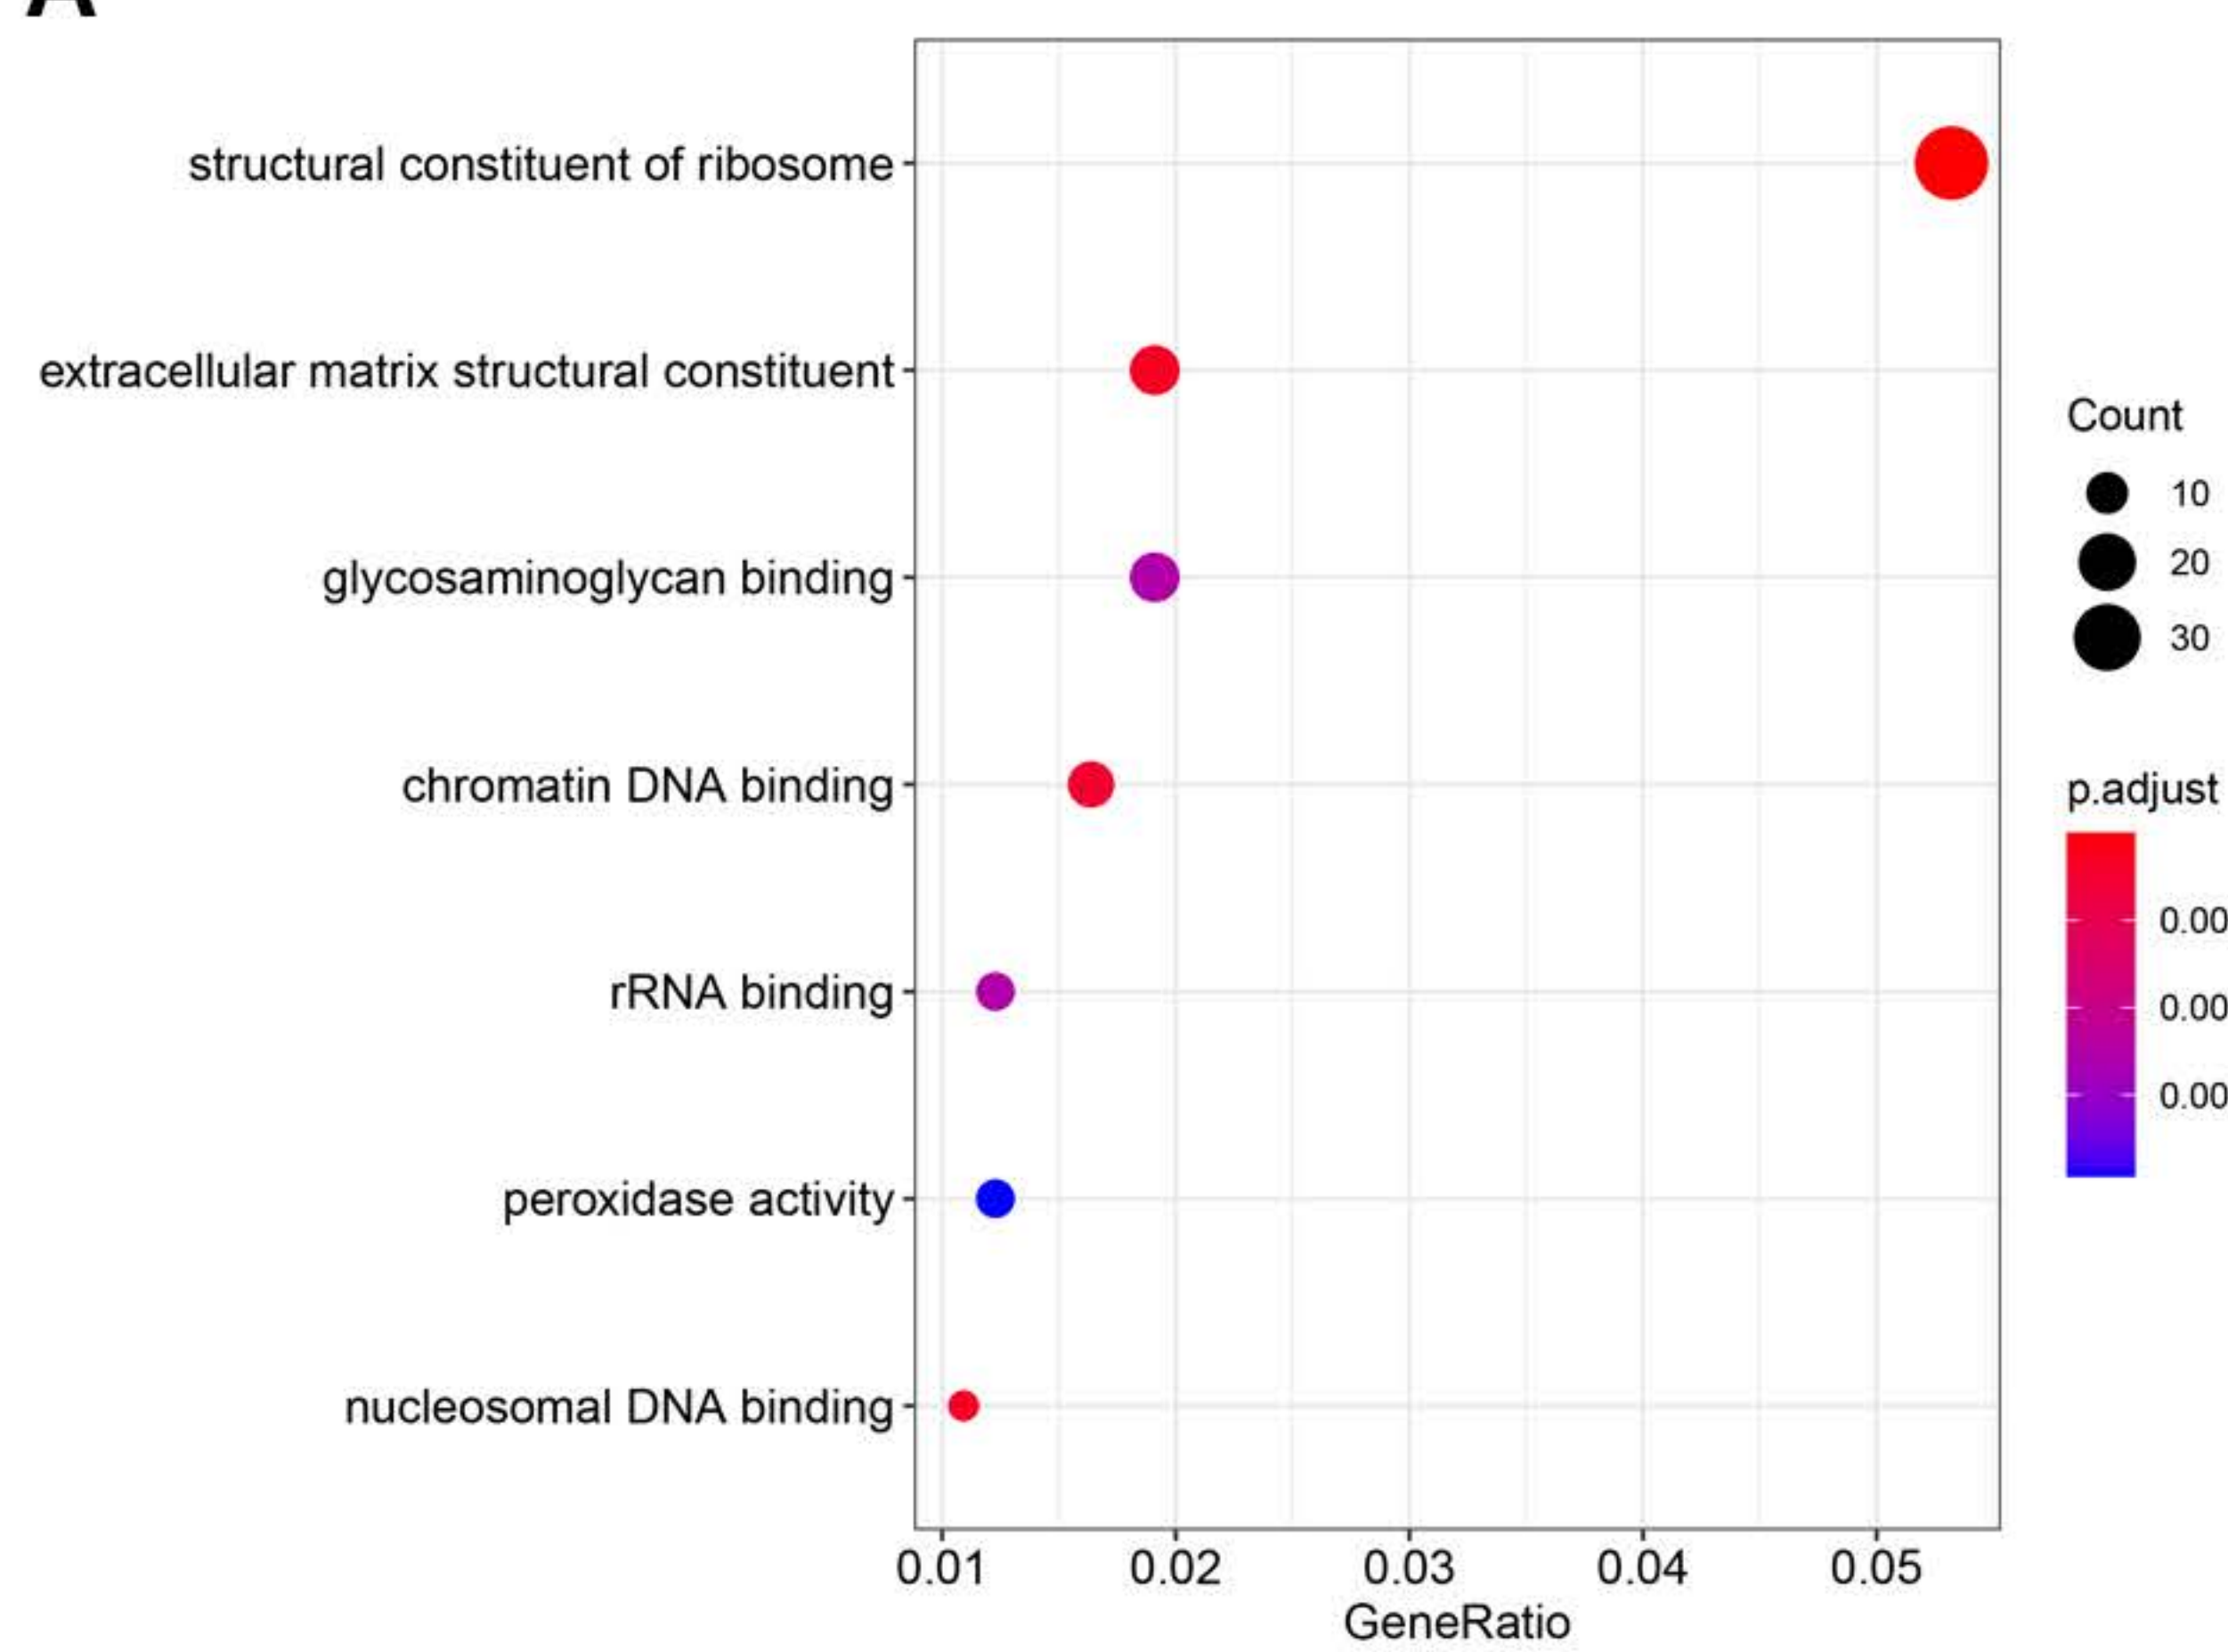

## B

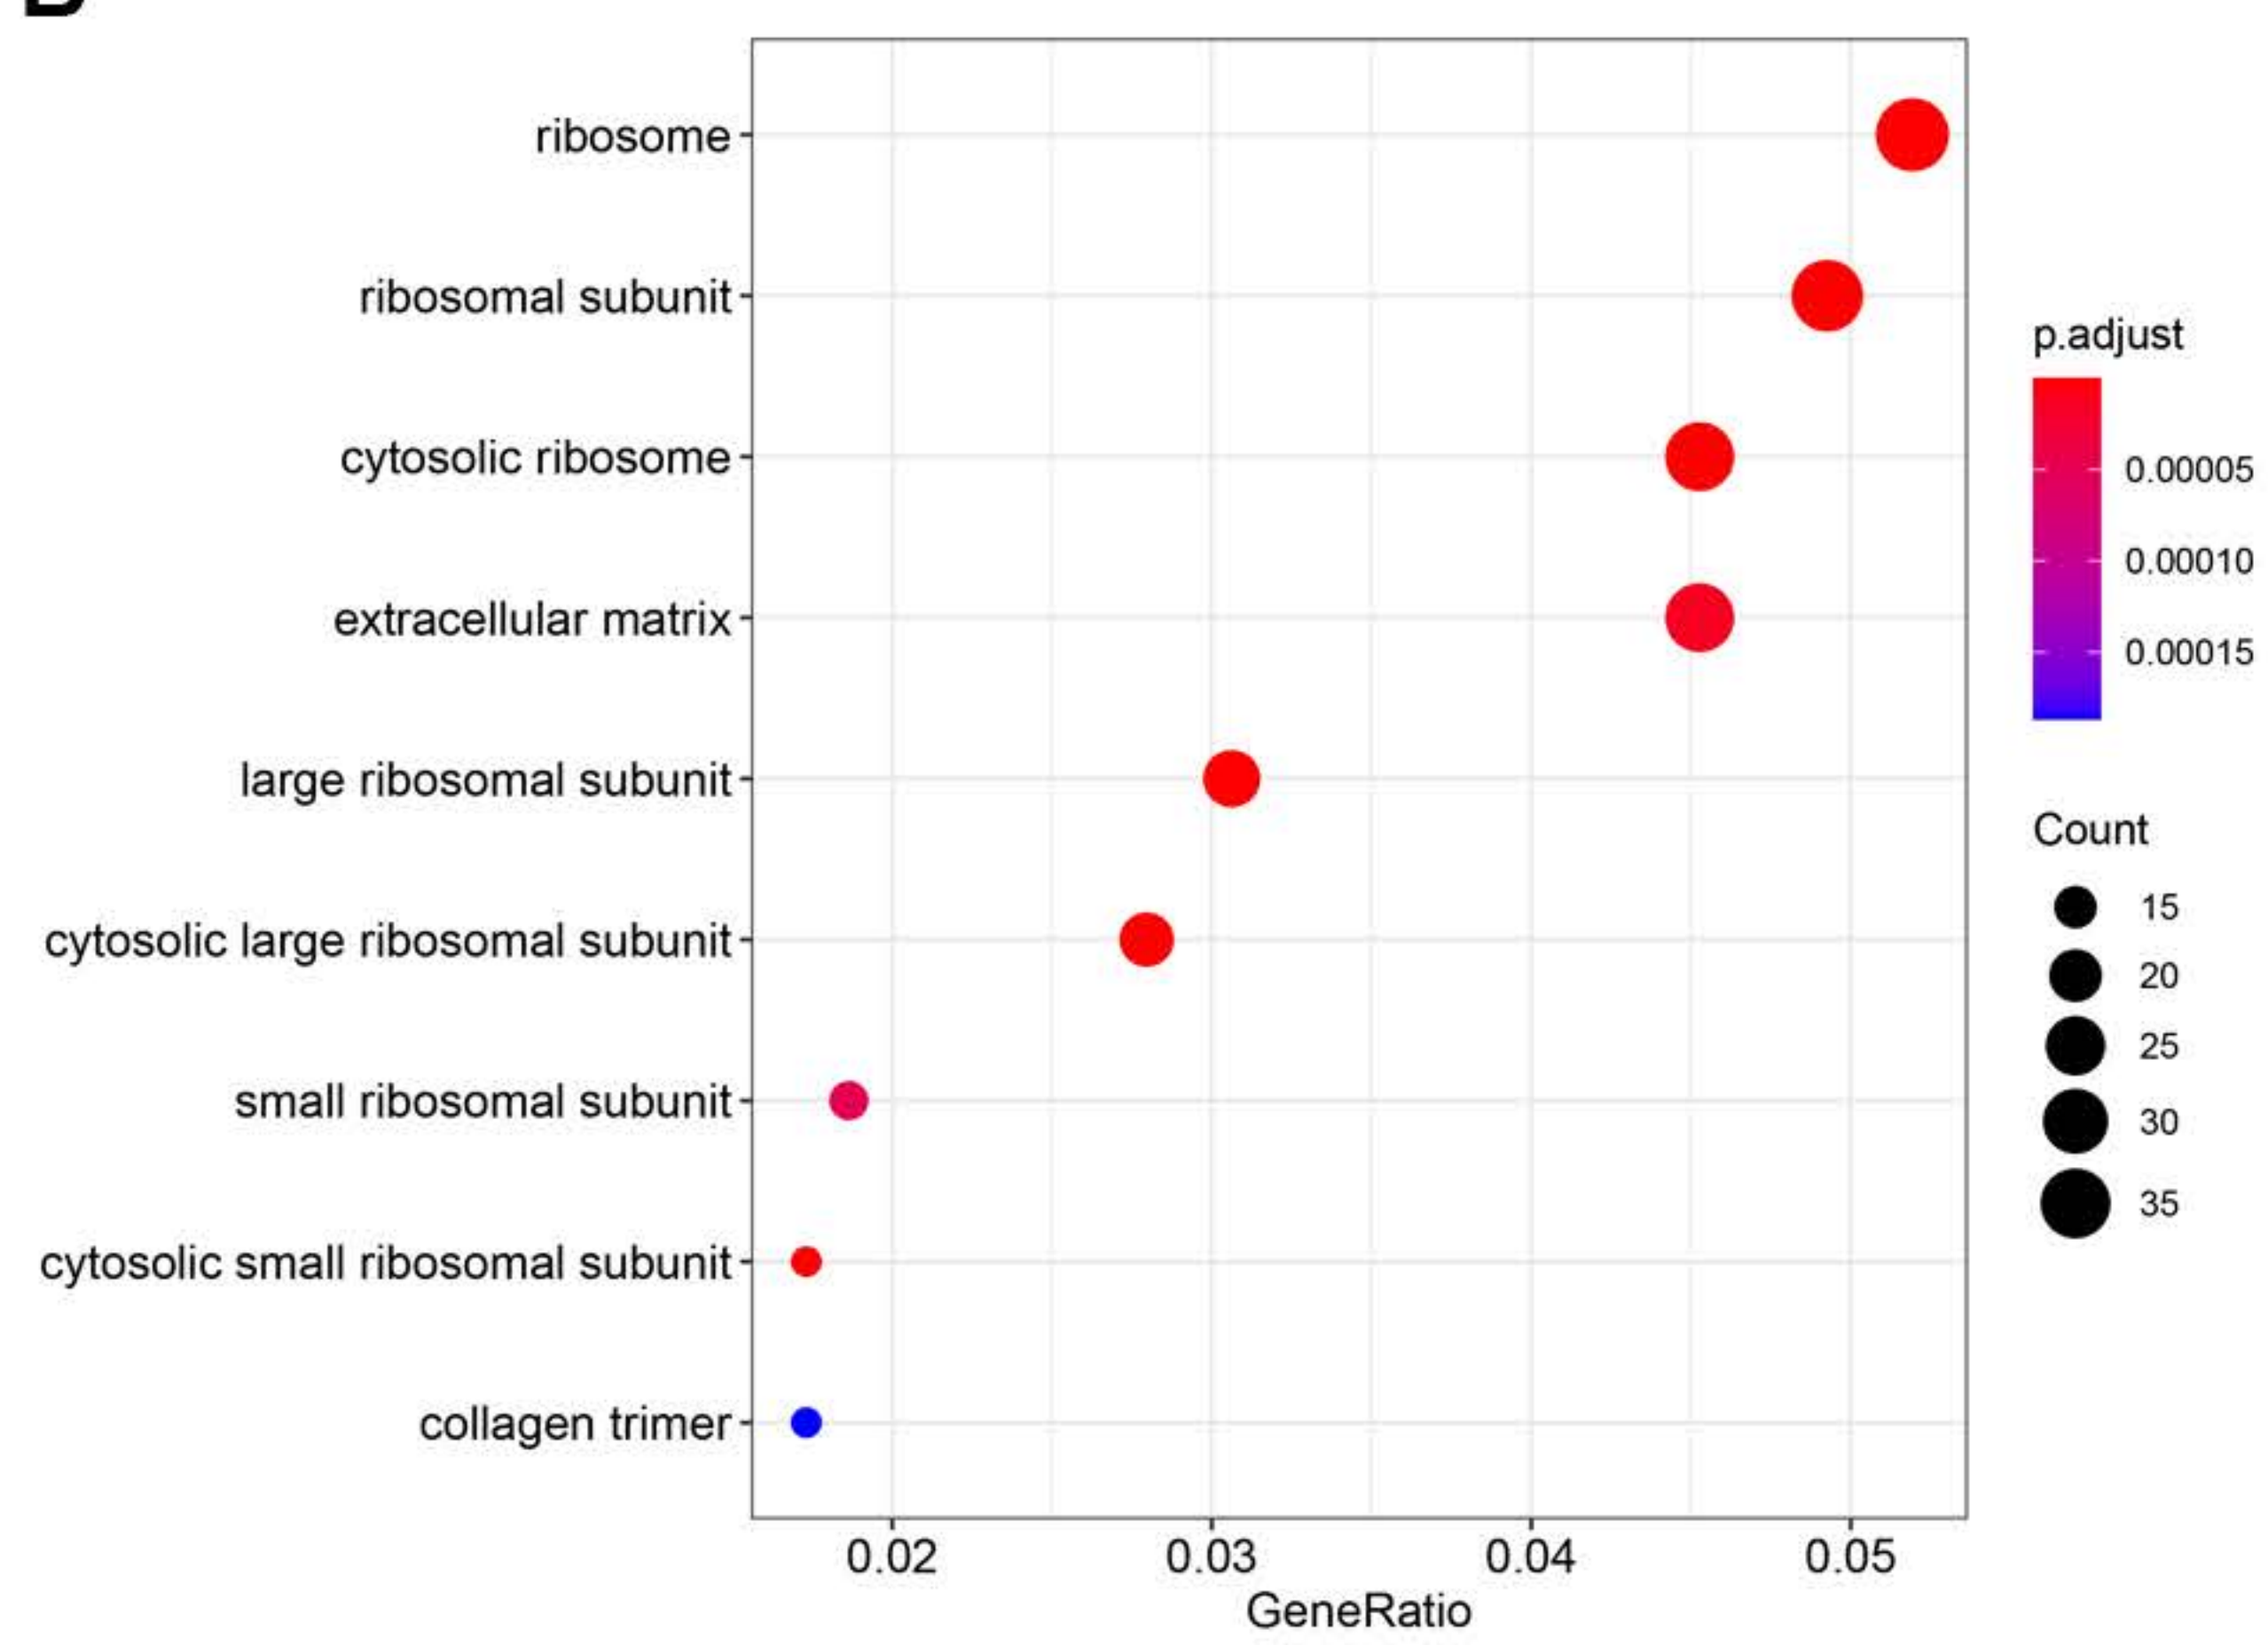

# Supplementary Figure 2

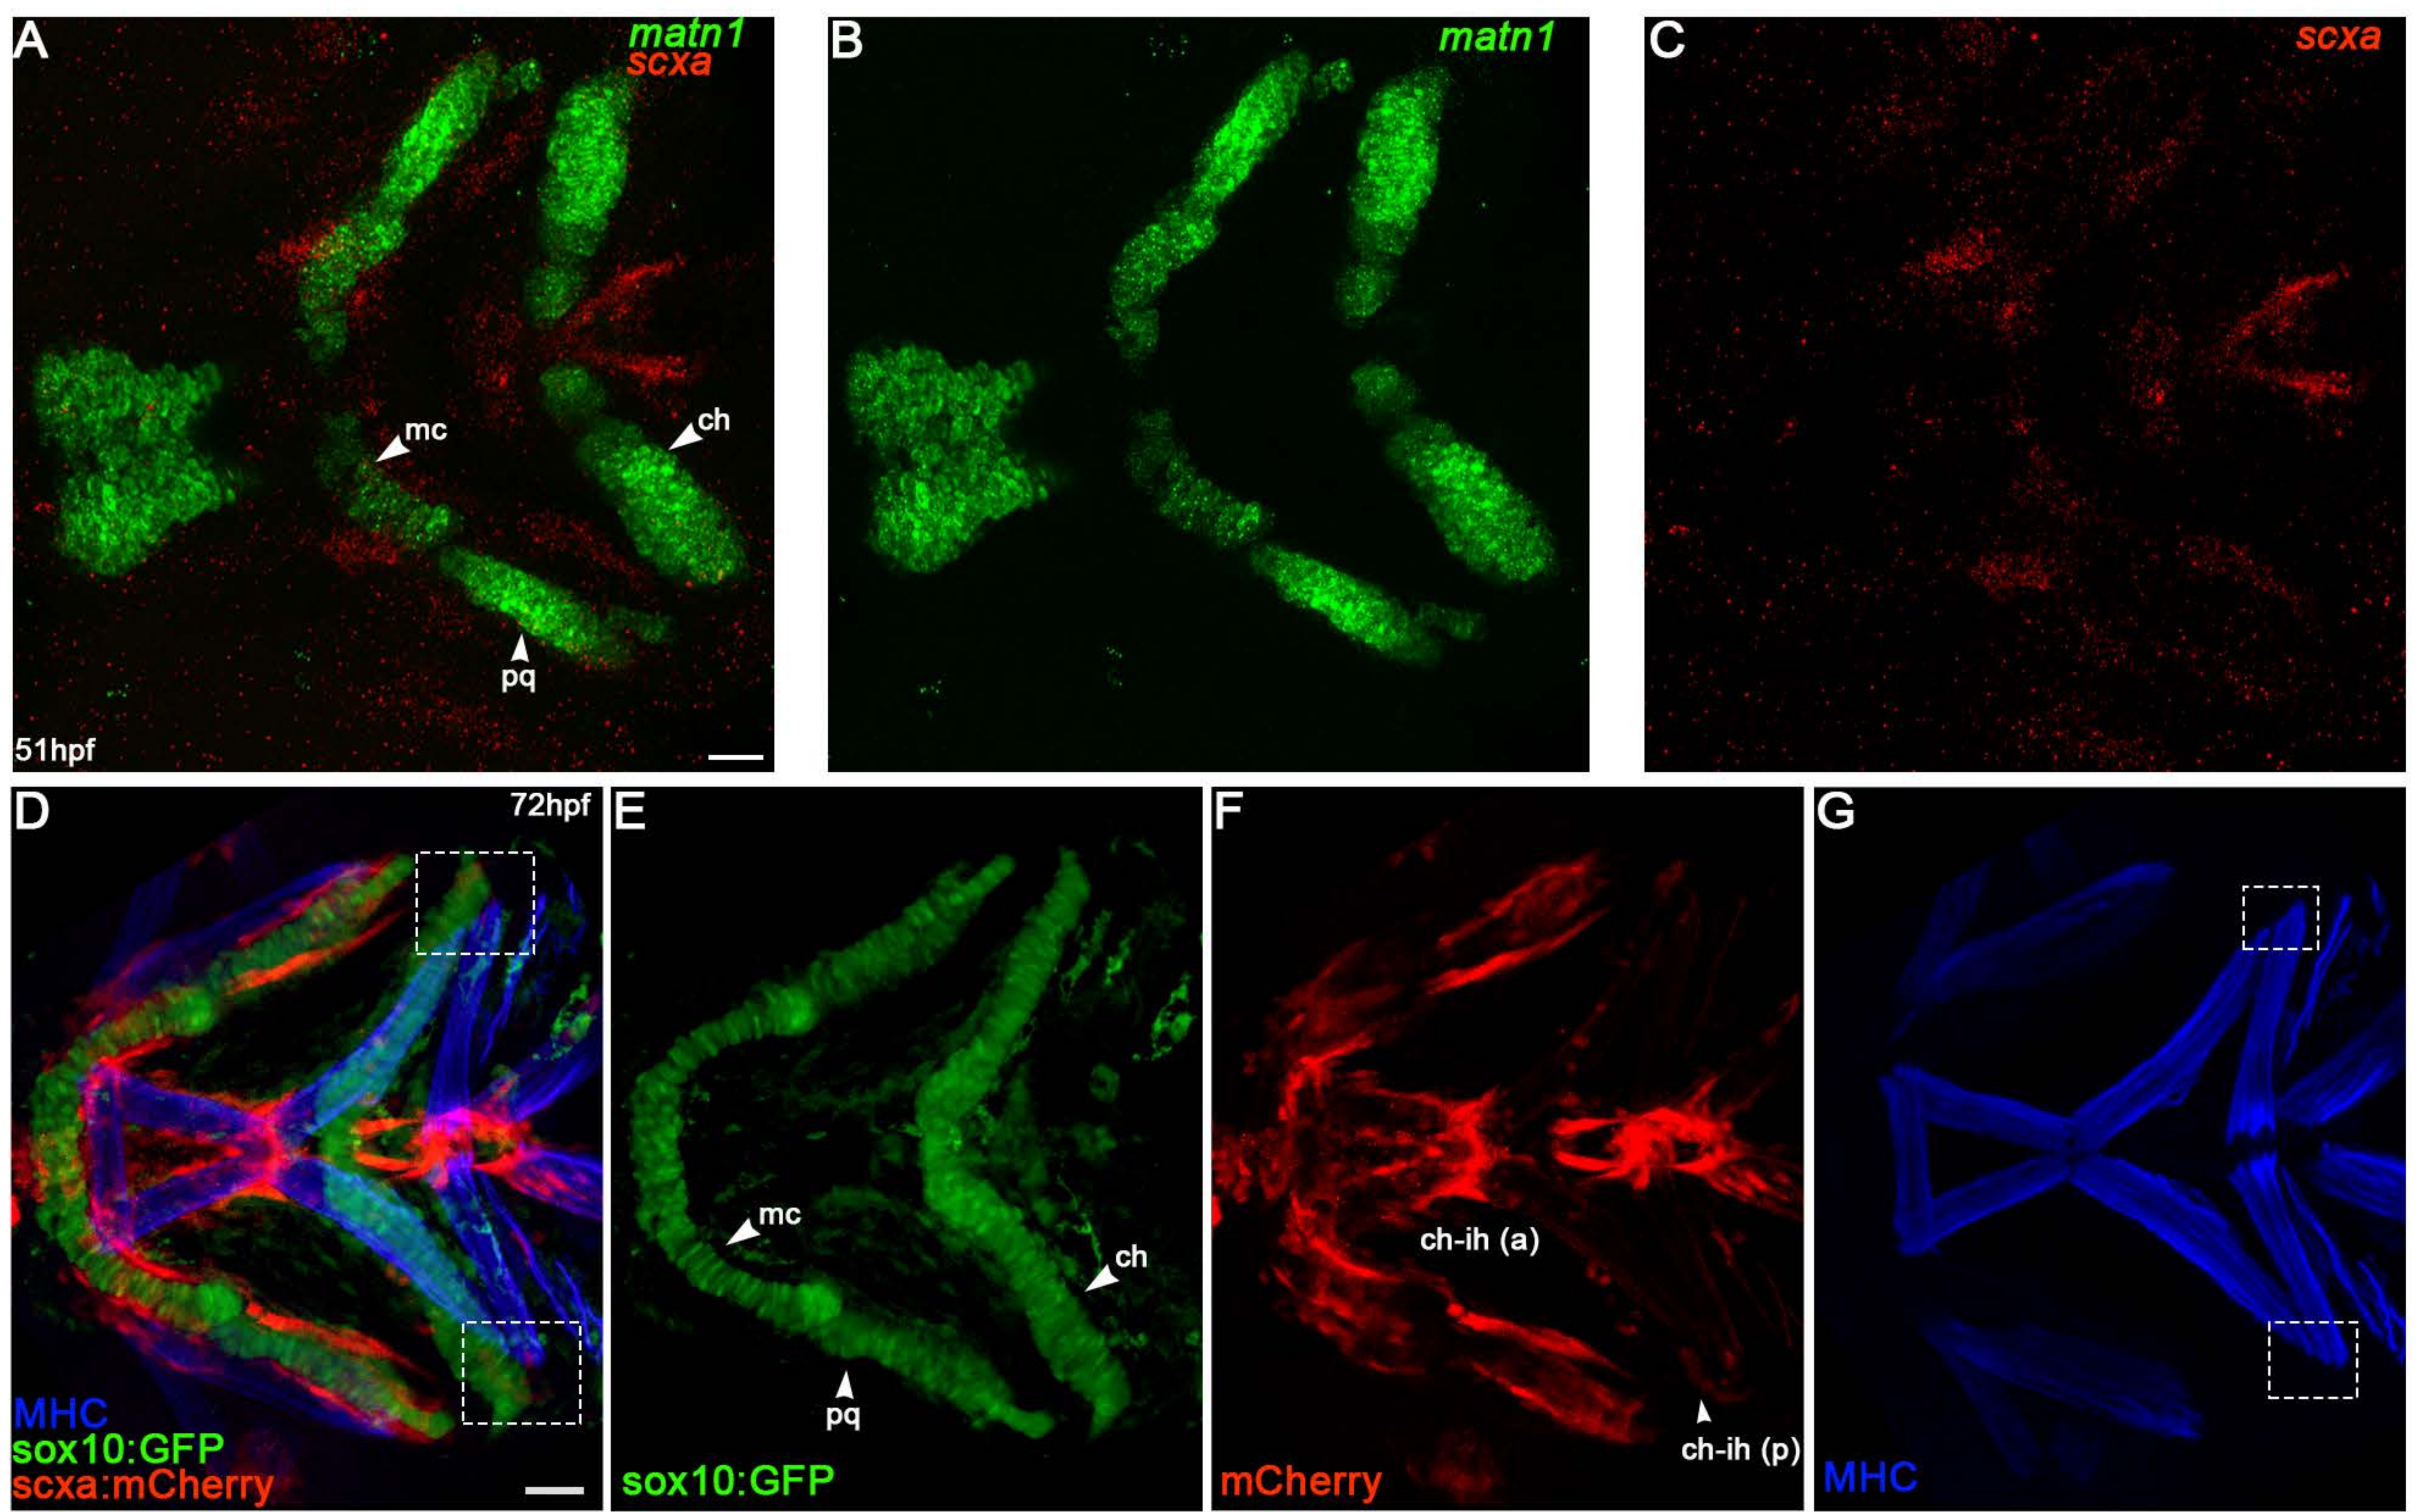

**Supplementary Table 1**  
**PANTHER Bioinformatics Pathway Analysis**

| PANTHER Pathway                                                                            | Number of Genes | Genes                                                                                                                                                  |
|--------------------------------------------------------------------------------------------|-----------------|--------------------------------------------------------------------------------------------------------------------------------------------------------|
| Gonadotropin-releasing hormone receptor pathway (P06664)                                   | 17              | <i>prkg1, prkcg, atf2, egr1, fsta, tgf3, fosb, fstb, jun, tuba1c, jund, junb, atf3, fosab, id3, cacna1sa, nfatc1</i>                                   |
| CKK signaling map (P06959)                                                                 | 16              | <i>prkg1, prkcg, atf2, egr1, mycb, cdk18b, pip2f5a, smad3a, cdn11, wnt7aa, casr1b, fdr7a, wnt11, act1b, fosab, mych, id3, cacna1sa, nfatc1</i>         |
| Wnt signaling pathway (P00057)                                                             | 16              | <i>prkg1, prkcg, atf2, egr1, mycb, cdk18b, pip2f5a, smad3a, cdn11, wnt7aa, casr1b, fdr7a, wnt11, act1b, fosab, mych, id3, cacna1sa, nfatc1</i>         |
| Apoptosis signaling pathway (P00006)                                                       | 13              | <i>ifit2, nfkbab, prkcg, atf2, egr1, mycb, cdk18b, pip2f5a, smad3a, cdn11, wnt7aa, casr1b, fdr7a, wnt11, act1b, fosab, mych, id3, cacna1sa, nfatc1</i> |
| Integrin signaling pathway (P00034)                                                        | 13              | <i>col1a1a, col11a2, col18a1a, col9a3, itgb6, col5a2b, col8a1a, actn3b, col6a1, actn3a, bcar1, col11a1a, si:ch211-195o20.7</i>                         |
| Inflammation mediated by chemokine and cytokine signaling pathway (P00031)                 | 12              | <i>nfkbab, nfkbaa, plcd4b, jun, act1b, junb, junbb, myh9a, myh9b, col6a1, rap2a, nfatc1</i>                                                            |
| TGF-beta signaling pathway (P00052)                                                        | 10              | <i>atf2, smad7, bmp8a, tgfb3, acv11, jun, jund, gdf5b, junbb, gdf5</i>                                                                                 |
| PDGF signaling pathway (P00047)                                                            | 10              | <i>ifrgapp271, gsk3, nin, mycb, foab, jun, mapk15, mych, fosab, rap2a</i>                                                                              |
| Angiogenesis (P00005)                                                                      | 9               | <i>hif1ab, fzd3b, prkcg, plcd2, wnt7aa, f3b, jun, fosab</i>                                                                                            |
| Huntington disease (P00029)                                                                | 9               | <i>dyx1l2b, tp73, capn3b, si:ch211-251b21.1, fosb, jun, act1b, fosab, tubb6</i>                                                                        |
| Cadherin signaling pathway (P00012)                                                        | 8               | <i>fzd3b, cdk18a, cdh11, wnt7aa, celsr1b, fzd7a, act1b</i>                                                                                             |
| Alzheimer disease-presentation pathway (P00004)                                            | 7               | <i>fzd3b, wnt7aa, fzd7a, furina, wnt11, act1b, appb</i>                                                                                                |
| T cell activation (P00053)                                                                 | 7               | <i>nfkbab, prkcg, nfkbaa, jun, fosab, rap2a, nfatc1</i>                                                                                                |
| Cytoskeletal regulation by Rho GTPase (P00016)                                             | 7               | <i>si:ch211-203d1.3, act1b, sh2b, rock2a, myh9a, myh9b, tubb6</i>                                                                                      |
| Parkinson disease (P00049)                                                                 | 6               | <i>snch, csn1da, plcd2, mapk15, uchl1, hck</i>                                                                                                         |
| Oxidative stress response (P00046)                                                         | 6               | <i>atf2, mycb, dup8a, jun, dup2, mych</i>                                                                                                              |
| Nicotinic acetylcholine receptor signaling pathway (P00044)                                | 6               | <i>myo1f, vamp2, act1b, myh9a, myh9b, cacna1sa, fosab</i>                                                                                              |
| Interleukin signaling pathway (P00036)                                                     | 6               | <i>mycb, foxo3b, mapk15, il16, mych, fosab</i>                                                                                                         |
| Oxytocin receptor mediated signaling pathway (P04391)                                      | 6               | <i>prkcg, gnb3a, gng2a, vamp2, plcd4b, cacna1sa</i>                                                                                                    |
| Heterotrimeric G-protein signaling pathway-Gi alpha and Gs alpha mediated pathway (P00026) | 6               | <i>gng2a, si:ch211-272n13.7, gk1a, adrb3a, adra1d</i>                                                                                                  |
| SH2 type receptor mediated signaling pathway (P04374)                                      | 6               | <i>prkcg, gnb3a, gng2a, vamp2, plcd4b, cacna1sa</i>                                                                                                    |
| Alzheimer disease-amyloid secretase pathway (P00003)                                       | 5               | <i>prkcg, furina, mapk15, appb, cacna1sa</i>                                                                                                           |
| Muscarinic acetylcholine receptor 1 and 3 signaling pathway (P00042)                       | 5               | <i>prkcg, gnb3a, gng2a, vamp2, kcnq2b</i>                                                                                                              |
| Metabotropic glutamate receptor group II pathway (P00040)                                  | 5               | <i>gnb3a, gng2a, vamp2, si:ch211-272n13.7, gnao1b</i>                                                                                                  |
| Metabotropic glutamate receptor group III pathway (P00039)                                 | 5               | <i>gnb3a, gng2a, vamp2, si:ch211-251b21.1, si:ch211-272n13.7</i>                                                                                       |
| Thyrotropin-releasing hormone receptor signaling pathway (P04394)                          | 5               | <i>prkcg, gnb3a, gng2a, plcd4b, gsk3</i>                                                                                                               |
| EGF receptor signaling pathway (P00018)                                                    | 5               | <i>gsk3, prkcg, hbegfa, ppp2f5a, mapk15</i>                                                                                                            |
| Beta2 adrenergic receptor signaling pathway (P04378)                                       | 5               | <i>gnb3a, gng2a, vamp2, si:ch211-272n13.7, cacna1sa</i>                                                                                                |
| B cell activation (P00010)                                                                 | 5               | <i>nfkbab, nfkbaa, jun, fosab, nfatc1</i>                                                                                                              |
| Beta1 adrenergic receptor signaling pathway (P04377)                                       | 5               | <i>gnb3a, gng2a, vamp2, si:ch211-272n13.7, cacna1sa</i>                                                                                                |
| Ubiquitin proteasome pathway (P00060)                                                      | 4               | <i>huawf2, ubc2a, medi9a</i>                                                                                                                           |
| Toll receptor signaling pathway (P00054)                                                   | 4               | <i>nfkbab, nfkbaa, jun, tl4ba</i>                                                                                                                      |
| Muscarinic acetylcholine receptor 2 and 4 signaling pathway (P00043)                       | 4               | <i>gnb3a, gng2a, vamp2, si:ch211-272n13.7</i>                                                                                                          |
| Insulin/IGF pathway-mitogen activated protein kinase kinase/MAK kinase cascade (P00032)    | 4               | <i>ifg2a, ifg2b, fosb, fosab</i>                                                                                                                       |
| Opioid proopiomelanocortin pathway (P05917)                                                | 4               | <i>gnb3a, gng2a, vamp2, gnao1b</i>                                                                                                                     |
| Opioid prodynorphin pathway (P05916)                                                       | 4               | <i>gnb3a, gng2a, vamp2, gnao1b</i>                                                                                                                     |
| Enkephalin release (P05911)                                                                | 4               | <i>gnb3a, gng2a, si:ch211-272n13.7, gnao1b</i>                                                                                                         |
| FGF signaling pathway (P00021)                                                             | 4               | <i>fgf10a, prkcg, ppp2f5a, fgf10b</i>                                                                                                                  |
| Histamine H1 receptor mediated signaling pathway (P04385)                                  | 4               | <i>prkcg, gnb3a, gng2a, plcd4b</i>                                                                                                                     |
| Endothelin signaling pathway (P00019)                                                      | 4               | <i>prkcg, ednra, furina, si:ch211-272n13.7</i>                                                                                                         |
| Beta3 adrenergic receptor signaling pathway (P04379)                                       | 4               | <i>gnb3a, gng2a, vamp2, adrb3a</i>                                                                                                                     |
| 5HT1 type receptor mediated signaling pathway (P04373)                                     | 4               | <i>gnb3a, gng2a, si:ch211-272n13.7, gnao1b</i>                                                                                                         |
| Neoch signaling pathway (P00045)                                                           | 3               | <i>hev1, neu4, neur1aa, si:ch211-272n13.7</i>                                                                                                          |
| Ionotropic glutamate receptor pathway (P00037)                                             | 3               | <i>vamp2, si:ch211-251b21.1, pick1</i>                                                                                                                 |
| Insulin/IGF pathway-protein kinase B signaling cascade (P00033)                            | 3               | <i>ifg2a, ifg2b, foxo3b, jun</i>                                                                                                                       |
| Ras Pathway (P04393)                                                                       | 3               | <i>atf2, pld2, mycb</i>                                                                                                                                |
| Heterotrimeric G-protein signaling pathway-rod outer segment phototransduction (P00028)    | 3               | <i>gng2a, cngb2b, gk1a</i>                                                                                                                             |
| Heterotrimeric G-protein signaling pathway-Cq alpha and Go alpha mediated pathway (P00027) | 3               | <i>prkcg, rs7b, gng2a</i>                                                                                                                              |
| Hedgehog signaling pathway (P00025)                                                        | 3               | <i>csnk1da, si:ch211-272n13.7, gli2b</i>                                                                                                               |
| Opioid proenkephalin pathway (P05915)                                                      | 3               | <i>gnb3a, gng2a, vamp2</i>                                                                                                                             |
| Dopamine receptor mediated signaling pathway (P05912)                                      | 3               | <i>vamp2, si:ch211-272n13.7, ppp1caa</i>                                                                                                               |
| Histamine H2 receptor mediated signaling pathway (P04386)                                  | 3               | <i>gnb3a, gng2a, si:ch211-272n13.7</i>                                                                                                                 |
| Corticotropin releasing factor receptor signaling pathway (P04380)                         | 3               | <i>gnb3a, gng2a, vamp2</i>                                                                                                                             |
| DNA replication (P00017)                                                                   | 3               | <i>top2a, h3f3d, pcna</i>                                                                                                                              |
| Blood coagulation (P00011)                                                                 | 3               | <i>f10, f3b, appb</i>                                                                                                                                  |
| 5HT4 type receptor mediated signaling pathway (P04376)                                     | 3               | <i>gnb3a, gng2a, vamp2</i>                                                                                                                             |
| Toll pathway-drosophila (P06217)                                                           | 2               | <i>nfkbab, nfkbaa</i>                                                                                                                                  |
| Axon guidance mediated by Slit/Robo (P00008)                                               | 2               | <i>slit1, obcnb</i>                                                                                                                                    |
| Alpha adrenergic receptor signaling pathway (P00002)                                       | 2               | <i>vamp2, adra1d</i>                                                                                                                                   |
| p53 pathway (P00059)                                                                       | 2               | <i>tp73, rrm2, prkcg</i>                                                                                                                               |
| VEGF signaling pathway (P00056)                                                            | 2               | <i>hif1ab, prkcg</i>                                                                                                                                   |
| Transcription regulation by bZIP transcription factor (P00055)                             | 2               | <i>si:ch211-272n13.7, ttf1.1</i>                                                                                                                       |
| PK3 kinase pathway (P00048)                                                                | 2               | <i>lowo3b, gng2a</i>                                                                                                                                   |
| GABA-B receptor II signaling (P05731)                                                      | 2               | <i>gng2a, si:ch211-272n13.7</i>                                                                                                                        |
| Interferon-gamma signaling pathway (P00035)                                                | 2               | <i>mapk15, socs3b</i>                                                                                                                                  |
| p53 pathway by glucose deprivation (P04397)                                                | 2               | <i>prkag1, tp73</i>                                                                                                                                    |
| Vitamin D metabolism and pathway (P04396)                                                  | 2               | <i>fdxr, cyp24a1</i>                                                                                                                                   |
| Serine glycine biosynthesis (P02776)                                                       | 2               | <i>psat1, pghd</i>                                                                                                                                     |
| FAS signaling pathway (P00020)                                                             | 2               | <i>jun, insh1</i>                                                                                                                                      |
| Angiotensin II-stimulated signaling through G proteins and beta-arrestin (P05911)          | 2               | <i>egf1, gng2a</i>                                                                                                                                     |
| Circadian clock system (P00015)                                                            | 2               | <i>csnk1da, cry3a</i>                                                                                                                                  |
| 5-Hydroxytryptamine degradation (P04372)                                                   | 2               | <i>aloh1a2, aldh3a2b</i>                                                                                                                               |
| Pyridoxal-5-phosphate biosynthesis (P02759)                                                | 1               | <i>psat1</i>                                                                                                                                           |
| Orrithine degradation (P02758)                                                             | 1               | <i>aszn1b</i>                                                                                                                                          |
| Adrenaline and noradrenaline biosynthesis (P00001)                                         | 1               | <i>vamp2</i>                                                                                                                                           |
| Glutamine glutamate conversion (P02745)                                                    | 1               | <i>lgsn</i>                                                                                                                                            |
| Formyltetrahydrofolate biosynthesis (P02743)                                               | 1               | <i>dhfr</i>                                                                                                                                            |
| Tetrahydrofolate biosynthesis (P02742)                                                     | 1               | <i>dhfr</i>                                                                                                                                            |
| De novo pyrimidine deoxyribonucleotide biosynthesis (P02739)                               | 1               | <i>rrn2, ttf1.1</i>                                                                                                                                    |
| De novo purine biosynthesis (P02738)                                                       | 1               | <i>rrn2</i>                                                                                                                                            |
| Synaptic vesicle trafficking (P05734)                                                      | 1               | <i>vamp2</i>                                                                                                                                           |
| Endogenous cannabinoid signaling (P05730)                                                  | 1               | <i>gng2a</i>                                                                                                                                           |
| Xanthine and guanine salvage pathway (P02788)                                              | 1               | <i>pnp5b</i>                                                                                                                                           |
| Adenine and hypoxanthine salvage pathway (P02723)                                          | 1               | <i>pnp5b</i>                                                                                                                                           |
| Vitamin B6 metabolism (P02787)                                                             | 1               | <i>psat1</i>                                                                                                                                           |
| Hypoxia response via HIF activation (P00030)                                               | 1               | <i>hif1ab</i>                                                                                                                                          |
| Thiamin metabolism (P02780)                                                                | 1               | <i>tpk2</i>                                                                                                                                            |
| p53 pathway feedback loops 1 (P04392)                                                      | 1               | <i>tp73</i>                                                                                                                                            |
| General transcription regulation (P00023)                                                  | 1               | <i>ttf1.1</i>                                                                                                                                          |
| General transcription by RNA polymerase I (P00022)                                         | 1               | <i>ttf1.1</i>                                                                                                                                          |
| Nicotinic pharmacodynamics pathway (P00587)                                                | 1               | <i>ppp1aa</i>                                                                                                                                          |
| S-adenosylmethionine biosynthesis (P02773)                                                 | 1               | <i>met1a</i>                                                                                                                                           |
| Pyruvate metabolism (P02772)                                                               | 1               | <i>pck1</i>                                                                                                                                            |
| Purine metabolism (P02769)                                                                 | 1               | <i>pnp5b</i>                                                                                                                                           |
| 5HT3 type receptor mediated signaling pathway (P04375)                                     | 1               | <i>vamp2</i>                                                                                                                                           |

**Supplementary Table 2**

DAVID Bioinformatics Pathway Analysis

| Kegg Pathway           | No. of Genes | P-value  | Genes                                                                                                                                                                    |
|------------------------|--------------|----------|--------------------------------------------------------------------------------------------------------------------------------------------------------------------------|
| Ribosome               | 45           | 2.20E-24 | <i>rpl10</i> <i>rpl10a</i> <i>rpl12</i> <i>rpl13</i> <i>rpl15</i> <i>rpl17</i> <i>rpl19</i> <i>rpl21</i> <i>rpl22</i> <i>rpl23</i> <i>rpl23a</i> <i>rpl24</i>            |
|                        |              |          | <i>rpl32</i> <i>rpl136a</i> <i>rpl38</i> <i>rpl39</i> <i>rpl14</i> <i>rpl15a</i> <i>rpl7</i> <i>rpl8</i> <i>rpl9</i> <i>rps10</i> <i>rps11</i> <i>rps12</i>              |
|                        |              |          | <i>rps18</i> <i>rps19</i> <i>rps24</i> <i>rps25</i> <i>rps26l</i> <i>rps29</i> <i>rps3a</i> <i>rps8a</i> <i>rps9</i> <i>rpsa</i> <i>rplp12l</i> <i>rplp0</i>             |
|                        |              |          | <i>rpl28</i> <i>rpl29</i> <i>rps15a</i> <i>rps16</i> <i>rplp1</i> <i>uba52</i>                                                                                           |
| Glutathione metabolism | 8            | 2.50E-02 | <i>gstp1</i> <i>gsta.1</i> <i>gpx1a</i> <i>gpx8</i> <i>mgst1.2</i> <i>mgst2</i> <i>rrm2</i> <i>rrm2</i>                                                                  |
| Retinol metabolism     | 6            | 5.40E-02 | <i>aldh1a2</i> <i>bco1</i> <i>cyp26c1</i> <i>cyp26b1</i> <i>rdh8a</i> <i>rdh8b</i>                                                                                       |
| Insulin resistance     | 12           | 9.40E-02 | <i>cpt1ab</i> <i>mgea5</i> <i>nfkbiab</i> <i>nfkbiab</i> <i>pck1</i> <i>pygma</i> <i>prkcg</i> <i>prkag1</i> <i>ppp1caa</i> <i>ppp1r3b</i> <i>ppp1r3cb</i> <i>socs3b</i> |



**Supplementary Table 3**

Primers for in situ hybridization and RT-qPCR

| Name           | Sequence                                         | Gene                                   | Usage                                 | Primer Pair Efficiency (for RT-qPCR) |
|----------------|--------------------------------------------------|----------------------------------------|---------------------------------------|--------------------------------------|
| matn1-FP       | CACCCGGATCTTTCAAGTGC                             | <i>matrilin 1</i>                      | in situ hybridization probe synthesis |                                      |
| matn1-RP-T7    | <b>TAATACGACTCACTATAGGG</b> ATTACACACCACGTCCCCA  |                                        | in situ hybridization probe synthesis |                                      |
| klf2a-FP       | GCAGCAGCTATATACCGGGG                             | <i>kruppel like factor 2a</i>          | in situ hybridization probe synthesis |                                      |
| klf2a-RP-T7    | <b>TAATACGACTCACTATAGGG</b> AGCCTTCCCAACTGCAATGA |                                        | in situ hybridization probe synthesis |                                      |
| mxra5b-FP      | TGGCATCTCCAAACAGGTCC                             | <i>matrix remodeling associated 5b</i> | in situ hybridization probe synthesis |                                      |
| mxra5b-RP-T7   | <b>TAATACGACTCACTATAGGG</b> GGCTGGATTAACCTCCGCCT |                                        | in situ hybridization probe synthesis |                                      |
| rpl13a-FP-qPCR | TCTGGAGGACTGTAAGAGGTATGC                         | <i>ribosomal protein L13a</i>          | RT-qPCR                               | 1.86                                 |
| rpl13a-RP-qPCR | AGACGCACAATCITGAGAGCAG                           |                                        | RT-qPCR                               |                                      |
| matn1-FP-qPCR  | CTATGCATCTTGGGAGCTCAA                            | <i>matrilin 1</i>                      | RT-qPCR                               | 1.92                                 |
| matn1-RP-qPCR  | ACTTTAACCTGCTCGAACTCAG                           |                                        | RT-qPCR                               |                                      |
| klf2a-FP-qPCR  | CAGTTACCGTGCAATTCTGTG                            | <i>kruppel like factor 2a</i>          | RT-qPCR                               | 1.94                                 |
| klf2a-RP-qPCR  | CGTTTCTGATGGTAAAAGTGCC                           |                                        | RT-qPCR                               |                                      |
| mxra5b-FP-qPCR | AGACGGTGCTTTTCAGGATC                             | <i>matrix remodeling associated 5b</i> | RT-qPCR                               | 1.91                                 |
| mxra5b-RP-qPCR | GATGGAGGAGATGTGGTTGTG                            |                                        | RT-qPCR                               |                                      |
